# Supplementary material for: Allele specific expression and methylation in the bumblebee, Bombus terrestris
Source: PeerJ. 2017 Sep 13;5:e3798. doi: 10.7717/peerj.3798 (PMC5600721; doi:10.7717/peerj.3798)
Supplement: Table S2 — For each of the 19 contigs, the previously published RNA-seq libraries with associated read counts are included. [file peerj-05-3798-s002.xlsx]

## Sheet: supplementary_table_2.csv
Contig	snps(expressed_allele|mRNA_info|medip_info|mre_info)	Present in the 29lib?
AELG01000543.1	mre|3143|1/1:99:18:255,54,0|0/0:NA|1/1:33:6:149,18,0	gi|313881757|gb|AELG01000543.1| 3143 . C T 94.5 . DP=4;VDB=7.064840e-02;AF1=1;AC1=2;DP4=0,0,2,2;MQ=37;FQ=-39 GT:PL:DP:GQ 1/1:127,12,0:4:21
		gi|313881757|gb|AELG01000543.1| 3143 . C T 76 . DP=8;VDB=8.228788e-02;RPB=6.486824e-01;AF1=0.5;AC1=1;DP4=2,1,3,1;MQ=37;FQ=57;PV4=1,0.081,1,0.41 GT:PL:DP:GQ 0/1:106,0,84:7:87
		gi|313881757|gb|AELG01000543.1| 3143 . C T 222 . DP=43;VDB=2.788887e-01;AF1=1;AC1=2;DP4=0,0,14,28;MQ=60;FQ=-153 GT:PL:DP:GQ 1/1:255,126,0:42:99
AELG01000544.1	medip|153622|0/0:NA|0/0:NA|1/1:4:13:42,2,0	-
AELG01000620.1	medip|45850|0/0:NA|0/0:NA|1/1:45:8:213,24,0	gi|313881680|gb|AELG01000620.1| 45850 . C G 119 . DP=20;VDB=1.701483e-02;RPB=1.118699e+00;AF1=0.5;AC1=1;DP4=2,10,5,3;MQ=36;FQ=122;PV4=0.062,0.099,0.39,1 GT:PL:DP:GQ 0/1:149,0,206:20:99
		gi|313881680|gb|AELG01000620.1| 45850 . C G 119 . DP=28;VDB=2.899710e-02;RPB=2.038931e-01;AF1=0.5;AC1=1;DP4=6,11,4,4;MQ=36;FQ=122;PV4=0.67,0.22,0.29,0.46 GT:PL:DP:GQ 0/1:149,0,255:25:99
		gi|313881680|gb|AELG01000620.1| 45850 . C G 41 . DP=20;VDB=2.444842e-02;RPB=1.539883e+00;AF1=0.5;AC1=1;DP4=7,7,1,3;MQ=36;FQ=44;PV4=0.59,0.32,1,1 GT:PL:DP:GQ 0/1:71,0,255:18:74
		gi|313881680|gb|AELG01000620.1| 45850 . C G 77 . DP=26;VDB=9.052525e-02;RPB=2.450490e-01;AF1=0.5;AC1=1;DP4=7,10,4,2;MQ=37;FQ=80;PV4=0.37,0.034,1,1 GT:PL:DP:GQ 0/1:107,0,255:23:99
		gi|313881680|gb|AELG01000620.1| 45850 . C G 141 . DP=27;VDB=5.388302e-02;RPB=3.772776e-01;AF1=0.5;AC1=1;DP4=8,9,4,5;MQ=37;FQ=144;PV4=1,0.081,1,1 GT:PL:DP:GQ 0/1:171,0,255:26:99
		gi|313881680|gb|AELG01000620.1| 45850 . C G 95 . DP=24;VDB=1.896654e-02;RPB=1.460747e+00;AF1=0.5;AC1=1;DP4=9,8,2,5;MQ=36;FQ=98;PV4=0.39,0.47,0.26,1 GT:PL:DP:GQ 0/1:125,0,255:24:99
		gi|313881680|gb|AELG01000620.1| 45850 . C G 143 . DP=23;VDB=1.112095e-02;RPB=6.677806e-02;AF1=0.5;AC1=1;DP4=5,8,4,5;MQ=37;FQ=146;PV4=1,0.12,1,0.47 GT:PL:GQ 0/1:173,0,249:99
		gi|313881680|gb|AELG01000620.1| 45850 . C G 172 . DP=25;VDB=8.484775e-03;RPB=-1.760447e-01;AF1=0.5;AC1=1;DP4=4,6,4,7;MQ=36;FQ=169;PV4=1,0.26,1,0.17 GT:PL:GQ 0/1:202,0,197:99
		gi|313881680|gb|AELG01000620.1| 45850 . C G 159 . DP=27 VDB=9.441084e-03 RPB=-6.255175e-01 AF1=0.5 AC1=1 DP4=6,7,7,5 MQ=37 FQ=162 PV4=0.7,0.0046,1,0.072 GT:PL:GQ 0/1:189,0,244:99
		gi|313881680|gb|AELG01000620.1| 45850 . C G 81 . DP=26;VDB=1.034012e-01;RPB=3.026138e-02;AF1=0.5;AC1=1;DP4=8,10,4,3;MQ=37;FQ=84;PV4=0.67,0.0088,1,1 GT:PL:GQ 0/1:111,0,255:99
		gi|313881680|gb|AELG01000620.1| 45850 . C G 126 . DP=22;VDB=1.289334e-02;RPB=3.983138e-01;AF1=0.5;AC1=1;DP4=6,7,4,4;MQ=36;FQ=129;PV4=1,0.18,0.37,1 GT:PL:GQ 0/1:156,0,252:99
		gi|313881680|gb|AELG01000620.1| 45850 . C G 72 . DP=26;VDB=2.979435e-02;RPB=1.142675e+00;AF1=0.5;AC1=1;DP4=7,9,3,3;MQ=36;FQ=75;PV4=1,0.16,0.41,1 GT:PL:GQ 0/1:102,0,255:99
		gi|313881680|gb|AELG01000620.1| 45850 . C G 117 . DP=26;VDB=7.125761e-02;RPB=6.429911e-01;AF1=0.5;AC1=1;DP4=7,9,4,4;MQ=37;FQ=120;PV4=1,0.067,1,1 GT:PL:DP:GQ 0/1:147,0,255:24:99
		gi|313881680|gb|AELG01000620.1| 45850 . C G 222 . DP=25;VDB=3.478231e-02;AF1=1;AC1=2;DP4=0,0,9,12;MQ=36;FQ=-90 GT:PL:GQ 1/1:255,63,0:99
		gi|313881680|gb|AELG01000620.1| 45850 . C G 222 . DP=93;VDB=7.718160e-13;AF1=1;AC1=2;DP4=0,0,22,46;MQ=36;FQ=-232 GT:PL:DP:GQ 1/1:255,205,0:68:99
		gi|313881680|gb|AELG01000620.1| 45850 . C G 222 . DP=26;VDB=7.327349e-04;AF1=1;AC1=2;DP4=0,0,9,9;MQ=36;FQ=-81 GT:PL:DP:GQ 1/1:255,54,0:18:99
		gi|313881680|gb|AELG01000620.1| 45850 . C G 222 . DP=92;VDB=2.645789e-12;AF1=1;AC1=2;DP4=0,0,23,48;MQ=36;FQ=-241 GT:PL:DP:GQ 1/1:255,214,0:71:99
AELG01000623.1	medip|2544|1/1:99:28:255,84,0|1/1:45:8:213,24,0|0/0:NA	/Users/zoe/Desktop/Mark010/test.raw.vcf:gi|313881677|gb|AELG01000623.1| 2544 . A G 98.5 . DP=5;VDB=7.268232e-02;AF1=1;AC1=2;DP4=0,0,2,2;MQ=37;FQ=-39 GT:PL:DP:GQ 1/1:131,12,0:4:21
		/Users/zoe/Desktop/MarkNRW8/test.raw.vcf:gi|313881677|gb|AELG01000623.1| 2544 . A G 94.3 . DP=6;VDB=5.992068e-02;AF1=1;AC1=2;DP4=0,0,5,0;MQ=37;FQ=-42 GT:PL:DP:GQ 1/1:127,15,0:5:27
		/Users/zoe/Desktop/MarkNRW9/test.raw.vcf:gi|313881677|gb|AELG01000623.1| 2544 . A G 48 . DP=3;VDB=5.624503e-02;AF1=1;AC1=2;DP4=0,0,1,2;MQ=37;FQ=-36 GT:PL:DP:GQ 1/1:80,9,0:3:16
		/Users/zoe/Desktop/MarkNRW11/test.raw.vcf:gi|313881677|gb|AELG01000623.1| 2544 . A G 77.5 . DP=5;VDB=4.829127e-02;AF1=1;AC1=2;DP4=0,0,4,0;MQ=37;FQ=-39 GT:PL:DP:GQ 1/1:110,12,0:4:21
		/Users/zoe/Desktop/bee1.1/test.raw.vcf:gi|313881677|gb|AELG01000623.1| 2544 . A G 31.8 . DP=2;VDB=7.520000e-02;AF1=1;AC1=2;DP4=0,0,0,2;MQ=37;FQ=-33 GT:PL:DP:GQ 1/1:63,6,0:2:10
		/Users/zoe/Desktop/bee1.3/test.raw.vcf:gi|313881677|gb|AELG01000623.1| 2544 . A G 42.8 . DP=3;VDB=5.920000e-02;AF1=1;AC1=2;DP4=0,0,1,1;MQ=37;FQ=-33 GT:PL:DP:GQ 1/1:74,6,0:2:10
		/Users/zoe/Desktop/bee1.4/test.raw.vcf:gi|313881677|gb|AELG01000623.1| 2544 . A G 40.8 . DP=3;VDB=4.960000e-02;AF1=1;AC1=2;DP4=0,0,1,1;MQ=37;FQ=-33 GT:PL:DP:GQ 1/1:72,6,0:2:10
		/Users/zoe/Desktop/bee1.6/test.raw.vcf:gi|313881677|gb|AELG01000623.1| 2544 . A G 70 . DP=3;VDB=6.089532e-02;AF1=1;AC1=2;DP4=0,0,2,1;MQ=37;FQ=-36 GT:PL:DP:GQ 1/1:102,9,0:3:16
		/Users/zoe/Desktop/bee1.7/test.raw.vcf:gi|313881677|gb|AELG01000623.1| 2544 . A G 42.8 . DP=3;VDB=7.360000e-02;AF1=1;AC1=2;DP4=0,0,1,1;MQ=37;FQ=-33 GT:PL:GQ 1/1:74,6,0:10
		/Users/zoe/Desktop/bee1.11/test.raw.vcf:gi|313881677|gb|AELG01000623.1| 2544 . A G 64 . DP=4;VDB=5.361253e-02;AF1=1;AC1=2;DP4=0,0,1,2;MQ=37;FQ=-36 GT:PL:GQ 1/1:96,9,0:16
		/Users/zoe/Desktop/bee2.2/test.raw.vcf:gi|313881677|gb|AELG01000623.1| 2544 . A G 29 . DP=3;VDB=7.680000e-02;RPB=8.745357e-01;AF1=0.5004;AC1=1;DP4=1,0,2,0;MQ=37;FQ=3.55;PV4=1,0.33,1,0.029 GT:PL:DP:GQ 0/1:59,0,28:3:31
		/Users/zoe/Desktop/bee2.3/test.raw.vcf:gi|313881677|gb|AELG01000623.1| 2544 . A G 32.8 . DP=2;VDB=4.640000e-02;AF1=1;AC1=2;DP4=0,0,1,1;MQ=37;FQ=-33 GT:PL:GQ 1/1:64,6,0:10
		/Users/zoe/Desktop/bee2.9/test.raw.vcf:gi|313881677|gb|AELG01000623.1| 2544 . A G 222 . DP=26;VDB=1.574179e-01;AF1=1;AC1=2;DP4=0,0,13,9;MQ=37;FQ=-93 GT:PL:DP:GQ 1/1:255,66,0:22:99
		/Users/zoe/Desktop/bee1.11/test.raw.vcf:gi|313881677|gb|AELG01000623.1| 2544 . A G 64 . DP=4;VDB=5.361253e-02;AF1=1;AC1=2;DP4=0,0,1,2;MQ=37;FQ=-36 GT:PL:GQ 1/1:96,9,0:16
AELG01000829.1	mre|3176|1/1:69:12:255,36,0|0/0:NA|1/1:45:8:197,24,0	/Users/zoe/Desktop/Mark010/test.raw.vcf:gi|313881471|gb|AELG01000829.1| 3176 . C T 105 . DP=5;VDB=9.444086e-02;AF1=1;AC1=2;DP4=0,0,4,1;MQ=37;FQ=-42 GT:PL:DP:GQ 1/1:138,15,0:5:27
		/Users/zoe/Desktop/Mark011/test.raw.vcf:gi|313881471|gb|AELG01000829.1| 3176 . C T 105 . DP=5;VDB=9.444087e-02;AF1=1;AC1=2;DP4=0,0,3,2;MQ=35;FQ=-42 GT:PL:DP:GQ 1/1:138,15,0:5:27
		/Users/zoe/Desktop/MarkNRW8/test.raw.vcf:gi|313881471|gb|AELG01000829.1| 3176 . C T 47 . DP=7;VDB=6.278483e-02;RPB=5.460172e-01;AF1=0.5;AC1=1;DP4=2,1,1,2;MQ=37;FQ=49.6;PV4=1,0.15,1,0.28 GT:PL:DP:GQ 0/1:77,0,87:6:80
		/Users/zoe/Desktop/MarkNRW11/test.raw.vcf:gi|313881471|gb|AELG01000829.1| 3176 . C T 29 . DP=3;VDB=5.440000e-02;RPB=-8.745357e-01;AF1=0.5004;AC1=1;DP4=0,1,2,0;MQ=37;FQ=3.55;PV4=0.33,0.33,1,0.27 GT:PL:DP:GQ 0/1:59,0,28:3:31
		/Users/zoe/Desktop/bee1.4/test.raw.vcf:gi|313881471|gb|AELG01000829.1| 3176 . C T 71 . DP=3;VDB=6.442004e-02;AF1=1;AC1=2;DP4=0,0,2,1;MQ=37;FQ=-36 GT:PL:DP:GQ 1/1:103,9,0:3:16
		/Users/zoe/Desktop/bee1.6/test.raw.vcf:gi|313881471|gb|AELG01000829.1| 3176 . C T 74.5 . DP=6;VDB=6.845168e-02;AF1=1;AC1=2;DP4=0,0,1,3;MQ=37;FQ=-39 GT:PL:DP:GQ 1/1:107,12,0:4:21
		/Users/zoe/Desktop/bee1.7/test.raw.vcf:gi|313881471|gb|AELG01000829.1| 3176 . C T 97.5 . DP=4;VDB=8.051522e-02;AF1=1;AC1=2;DP4=0,0,1,3;MQ=37;FQ=-39 GT:PL:GQ 1/1:130,12,0:21
		/Users/zoe/Desktop/bee1.11/test.raw.vcf:gi|313881471|gb|AELG01000829.1| 3176 . C T 73 . DP=4;VDB=5.227153e-02;AF1=1;AC1=2;DP4=0,0,1,2;MQ=37;FQ=-36 GT:PL:GQ 1/1:105,9,0:16
		/Users/zoe/Desktop/bee2.2/test.raw.vcf:gi|313881471|gb|AELG01000829.1| 3176 . C T 36.8 . DP=3;VDB=6.880000e-02;AF1=1;AC1=2;DP4=0,0,1,1;MQ=37;FQ=-33 GT:PL:DP:GQ 1/1:68,6,0:2:10
		/Users/zoe/Desktop/bee1.11/test.raw.vcf:gi|313881471|gb|AELG01000829.1| 3176 . C T 73 . DP=4;VDB=5.227153e-02;AF1=1;AC1=2;DP4=0,0,1,2;MQ=37;FQ=-36 GT:PL:GQ 1/1:105,9,0:16
AELG01000969.1	mre|141694|1/1:51:9:244,27,0|0/0:NA|1/1:51:9:219,27,0	/Users/zoe/Desktop/bee1.11/test.raw.vcf:gi|313881324|gb|AELG01000969.1| 141694 . A G 21.8 . DP=2;VDB=6.240000e-02;AF1=1;AC1=2;DP4=0,0,1,1;MQ=37;FQ=-33 GT:PL:GQ 1/1:53,6,0:10
		/Users/zoe/Desktop/bee2.9/test.raw.vcf:gi|313881324|gb|AELG01000969.1| 141694 . A G 32.8 . DP=2;VDB=4.320000e-02;AF1=1;AC1=2;DP4=0,0,1,1;MQ=37;FQ=-33 GT:PL:DP:GQ 1/1:64,6,0:2:10
		/Users/zoe/Desktop/bee1.11/test.raw.vcf:gi|313881324|gb|AELG01000969.1| 141694 . A G 21.8 . DP=2;VDB=6.240000e-02;AF1=1;AC1=2;DP4=0,0,1,1;MQ=37;FQ=-33 GT:PL:GQ 1/1:53,6,0:10
AELG01000977.1	medip|211476|1/1:99:32:255,96,0|1/1:97:75:255,50,0|0/0:NA	-
AELG01001021.1	medip|3434|1/1:81:14:255,42,0|1/1:39:7:214,21,0|0/0:NA	/Users/zoe/Desktop/Mark011/test.raw.vcf:gi|313881245|gb|AELG01001021.1| 3434 . T C 35.8 . DP=2;VDB=4.320000e-02;AF1=1;AC1=2;DP4=0,0,2,0;MQ=37;FQ=-33 GT:PL:DP:GQ 1/1:67,6,0:2:10
		/Users/zoe/Desktop/MarkNRW8/test.raw.vcf:gi|313881245|gb|AELG01001021.1| 3434 . T C 48 . DP=5;VDB=2.570870e-02;RPB=-5.314005e-01;AF1=0.5;AC1=1;DP4=2,0,3,0;MQ=37;FQ=26;PV4=1,0.13,1,1 GT:PL:DP:GQ 0/1:78,0,53:5:56
		/Users/zoe/Desktop/bee2.9/test.raw.vcf:gi|313881245|gb|AELG01001021.1| 3434 . T C 14.2 . DP=10;VDB=6.560000e-02;RPB=6.527912e-01;AF1=0.5;AC1=1;DP4=6,2,1,1;MQ=37;FQ=17.1;PV4=1,1,1,1 GT:PL:DP:GQ 0/1:44,0,182:10:47
AELG01001796.1	medip|10938|1/1:45:21:255,24,0|1/1:99:46:255,138,0|0/0:NA	/Users/zoe/Desktop/Mark011/test.raw.vcf:gi|313880457|gb|AELG01001796.1| 10938 . G A 70 . DP=5;VDB=8.327157e-02;RPB=-8.293682e-01;AF1=0.5016;AC1=1;DP4=1,0,4,0;MQ=37;FQ=-6.18;PV4=1,1,1,1 GT:PL:DP:GQ 0/1:100,0,22:5:25
		/Users/zoe/Desktop/MarkNRW8/test.raw.vcf:gi|313880457|gb|AELG01001796.1| 10938 . G A 120 . DP=12;VDB=4.793958e-02;RPB=9.104187e-01;AF1=0.5;AC1=1;DP4=2,4,3,3;MQ=37;FQ=120;PV4=1,0.41,1,1 GT:PL:DP:GQ 0/1:150,0,150:12:99
		/Users/zoe/Desktop/MarkNRW11/test.raw.vcf:gi|313880457|gb|AELG01001796.1| 10938 . G A 172 . DP=9;VDB=1.111813e-01;AF1=1;AC1=2;DP4=0,0,4,3;MQ=37;FQ=-48 GT:PL:DP:GQ 1/1:205,21,0:7:39
		/Users/zoe/Desktop/bee1.2/test.raw.vcf:gi|313880457|gb|AELG01001796.1| 10938 . G A 41.8 . DP=2;VDB=2.560000e-02;AF1=1;AC1=2;DP4=0,0,1,1;MQ=37;FQ=-33 GT:PL:DP:GQ 1/1:73,6,0:2:10
		/Users/zoe/Desktop/bee1.3/test.raw.vcf:gi|313880457|gb|AELG01001796.1| 10938 . G A 35.8 . DP=2;VDB=5.280000e-02;AF1=1;AC1=2;DP4=0,0,0,2;MQ=37;FQ=-33 GT:PL:DP:GQ 1/1:67,6,0:2:10
		/Users/zoe/Desktop/bee1.4/test.raw.vcf:gi|313880457|gb|AELG01001796.1| 10938 . G A 55 . DP=3;VDB=5.498856e-02;AF1=1;AC1=2;DP4=0,0,0,3;MQ=37;FQ=-36 GT:PL:DP:GQ 1/1:87,9,0:3:16
		/Users/zoe/Desktop/bee1.8/test.raw.vcf:gi|313880457|gb|AELG01001796.1| 10938 . G A 35.8 . DP=2;VDB=5.600000e-02;AF1=1;AC1=2;DP4=0,0,0,2;MQ=37;FQ=-33 GT:PL:GQ 1/1:67,6,0:10
		/Users/zoe/Desktop/bee1.11/test.raw.vcf:gi|313880457|gb|AELG01001796.1| 10938 . G A 35.8 . DP=2;VDB=6.240000e-02;AF1=1;AC1=2;DP4=0,0,0,2;MQ=37;FQ=-33 GT:PL:GQ 1/1:67,6,0:10
		/Users/zoe/Desktop/bee1.12/test.raw.vcf:gi|313880457|gb|AELG01001796.1| 10938 . G A 35.8 . DP=2;VDB=5.440000e-02;AF1=1;AC1=2;DP4=0,0,0,2;MQ=37;FQ=-33 GT:PL:GQ 1/1:67,6,0:10
		/Users/zoe/Desktop/bee2.1/test.raw.vcf:gi|313880457|gb|AELG01001796.1| 10938 . G A 72 . DP=3;VDB=3.127017e-02;AF1=1;AC1=2;DP4=0,0,2,1;MQ=37;FQ=-36 GT:PL:GQ 1/1:104,9,0:16
		/Users/zoe/Desktop/bee2.3/test.raw.vcf:gi|313880457|gb|AELG01001796.1| 10938 . G A 32 . DP=3;VDB=4.000000e-02;RPB=-8.745357e-01;AF1=0.5004;AC1=1;DP4=0,1,1,1;MQ=37;FQ=3.55;PV4=1,0.41,1,1 GT:PL:GQ 0/1:62,0,28:31
		/Users/zoe/Desktop/bee1.11/test.raw.vcf:gi|313880457|gb|AELG01001796.1| 10938 . G A 35.8 . DP=2;VDB=6.240000e-02;AF1=1;AC1=2;DP4=0,0,0,2;MQ=37;FQ=-33 GT:PL:GQ 1/1:67,6,0:10
AELG01002224.1	medip|27215|1/1:99:33:255,99,0|1/1:69:12:255,36,0|0/0:NA	/Users/zoe/Desktop/Mark010/test.raw.vcf:gi|313880010|gb|AELG01002224.1| 27215 . A G 74 . DP=8;VDB=5.619835e-02;RPB=-9.980746e-01;AF1=0.5;AC1=1;DP4=2,1,2,2;MQ=37;FQ=52;PV4=1,0.42,1,0.099 GT:PL:DP:GQ 0/1:104,0,79:7:82
		/Users/zoe/Desktop/MarkRW7/test.raw.vcf:gi|313880010|gb|AELG01002224.1| 27215 . A G 140 . DP=11;VDB=1.037214e-01;RPB=7.343199e-01;AF1=0.5;AC1=1;DP4=3,1,5,2;MQ=37;FQ=72;PV4=1,1,1,1 GT:PL:DP:GQ 0/1:170,0,99:11:99
		/Users/zoe/Desktop/MarkNRW8/test.raw.vcf:gi|313880010|gb|AELG01002224.1| 27215 . A G 47 . DP=7;VDB=5.983360e-02;RPB=1.053122e+00;AF1=0.5;AC1=1;DP4=3,0,3,0;MQ=37;FQ=47;PV4=1,1,1,1 GT:PL:DP:GQ 0/1:77,0,77:6:77
		/Users/zoe/Desktop/MarkNRW11/test.raw.vcf:gi|313880010|gb|AELG01002224.1| 27215 . A G 96.3 . DP=5;VDB=7.760359e-02;AF1=1;AC1=2;DP4=0,0,5,0;MQ=37;FQ=-42 GT:PL:DP:GQ 1/1:129,15,0:5:27
		/Users/zoe/Desktop/bee1.2/test.raw.vcf:gi|313880010|gb|AELG01002224.1| 27215 . A G 52 . DP=3;VDB=6.695797e-02;AF1=1;AC1=2;DP4=0,0,3,0;MQ=33;FQ=-36 GT:PL:DP:GQ 1/1:84,9,0:3:16
		/Users/zoe/Desktop/bee1.3/test.raw.vcf:gi|313880010|gb|AELG01002224.1| 27215 . A G 58 . DP=7;VDB=4.829127e-02;RPB=-6.486824e-01;AF1=0.5;AC1=1;DP4=2,1,3,1;MQ=37;FQ=54.8;PV4=1,0.2,1,1 GT:PL:DP:GQ 0/1:88,0,83:7:85
		/Users/zoe/Desktop/bee1.4/test.raw.vcf:gi|313880010|gb|AELG01002224.1| 27215 . A G 20 . DP=6;VDB=5.920000e-02;RPB=8.071455e-01;AF1=0.5;AC1=1;DP4=3,1,2,0;MQ=37;FQ=23;PV4=1,1,1,1 GT:PL:DP:GQ 0/1:50,0,113:6:53
		/Users/zoe/Desktop/bee1.11/test.raw.vcf:gi|313880010|gb|AELG01002224.1| 27215 . A G 188 . DP=9;VDB=8.554666e-02;AF1=1;AC1=2;DP4=0,0,5,3;MQ=37;FQ=-51 GT:PL:GQ 1/1:221,24,0:45
		/Users/zoe/Desktop/bee2.3/test.raw.vcf:gi|313880010|gb|AELG01002224.1| 27215 . A G 140 . DP=6;VDB=9.321602e-02;AF1=1;AC1=2;DP4=0,0,3,3;MQ=37;FQ=-45 GT:PL:GQ 1/1:173,18,0:33
		/Users/zoe/Desktop/bee2.9/test.raw.vcf:gi|313880010|gb|AELG01002224.1| 27215 . A G 182 . DP=22;VDB=2.965213e-02;RPB=1.373149e+00;AF1=0.5;AC1=1;DP4=8,3,5,5;MQ=37;FQ=176;PV4=0.39,1,1,0.42 GT:PL:DP:GQ 0/1:212,0,203:21:99
		/Users/zoe/Desktop/bee1.11/test.raw.vcf:gi|313880010|gb|AELG01002224.1| 27215 . A G 188 . DP=9;VDB=8.554666e-02;AF1=1;AC1=2;DP4=0,0,5,3;MQ=37;FQ=-51 GT:PL:GQ 1/1:221,24,0:45
AELG01002224.1	medip|30824|1/1:99:50:255,151,0|1/1:57:10:255,30,0|0/0:NA	/Users/zoe/Desktop/Mark010/test.raw.vcf:gi|313880010|gb|AELG01002224.1| 30824 . A G 222 . DP=18;VDB=1.831351e-01;AF1=1;AC1=2;DP4=0,0,8,9;MQ=37;FQ=-78 GT:PL:DP:GQ 1/1:255,51,0:17:99
		/Users/zoe/Desktop/MarkNRW8/test.raw.vcf:gi|313880010|gb|AELG01002224.1| 30824 . A G 125 . DP=6;VDB=9.071144e-02;AF1=1;AC1=2;DP4=0,0,3,2;MQ=37;FQ=-42 GT:PL:DP:GQ 1/1:158,15,0:5:27
		/Users/zoe/Desktop/MarkNRW11/test.raw.vcf:gi|313880010|gb|AELG01002224.1| 30824 . A G 47 . DP=8;VDB=6.570053e-02;RPB=5.460172e-01;AF1=0.5;AC1=1;DP4=0,3,3,0;MQ=37;FQ=43;PV4=0.1,1,1,1 GT:PL:DP:GQ 0/1:77,0,71:6:73
		/Users/zoe/Desktop/bee1.1/test.raw.vcf:gi|313880010|gb|AELG01002224.1| 30824 . A G 35.8 . DP=2;VDB=7.200000e-02;AF1=1;AC1=2;DP4=0,0,0,2;MQ=37;FQ=-33 GT:PL:DP:GQ 1/1:67,6,0:2:10
		/Users/zoe/Desktop/bee1.2/test.raw.vcf:gi|313880010|gb|AELG01002224.1| 30824 . A G 176 . DP=9;VDB=4.670117e-02;AF1=1;AC1=2;DP4=0,0,2,6;MQ=37;FQ=-51 GT:PL:DP:GQ 1/1:209,24,0:8:45
		/Users/zoe/Desktop/bee1.3/test.raw.vcf:gi|313880010|gb|AELG01002224.1| 30824 . A G 177 . DP=11;VDB=8.944587e-02;RPB=1.392621e+00;AF1=1;AC1=2;DP4=0,1,6,3;MQ=37;FQ=-33;PV4=0.4,1,1,1 GT:PL:DP:GQ 1/1:208,6,0:10:10
		/Users/zoe/Desktop/bee1.5/test.raw.vcf:gi|313880010|gb|AELG01002224.1| 30824 . A G 35.8 . DP=4;VDB=3.040000e-02;AF1=1;AC1=2;DP4=0,0,0,2;MQ=37;FQ=-33 GT:PL:DP:GQ 1/1:67,6,0:2:10
		/Users/zoe/Desktop/bee1.6/test.raw.vcf:gi|313880010|gb|AELG01002224.1| 30824 . A G 208 . DP=10;VDB=9.806732e-02;AF1=1;AC1=2;DP4=0,0,4,5;MQ=37;FQ=-54 GT:PL:DP:GQ 1/1:241,27,0:9:51
		/Users/zoe/Desktop/bee1.7/test.raw.vcf:gi|313880010|gb|AELG01002224.1| 30824 . A G 35.8 . DP=4;VDB=4.320000e-02;AF1=1;AC1=2;DP4=0,0,0,2;MQ=37;FQ=-33 GT:PL:GQ 1/1:67,6,0:10
		/Users/zoe/Desktop/bee1.8/test.raw.vcf:gi|313880010|gb|AELG01002224.1| 30824 . A G 103 . DP=4;VDB=7.635114e-02;AF1=1;AC1=2;DP4=0,0,2,2;MQ=37;FQ=-39 GT:PL:GQ 1/1:135,12,0:21
		/Users/zoe/Desktop/bee1.11/test.raw.vcf:gi|313880010|gb|AELG01002224.1| 30824 . A G 128 . DP=5;VDB=8.616185e-02;AF1=1;AC1=2;DP4=0,0,2,3;MQ=37;FQ=-42 GT:PL:GQ 1/1:161,15,0:27
		/Users/zoe/Desktop/bee1.12/test.raw.vcf:gi|313880010|gb|AELG01002224.1| 30824 . A G 128 . DP=5;VDB=9.505586e-02;AF1=1;AC1=2;DP4=0,0,2,3;MQ=37;FQ=-42 GT:PL:GQ 1/1:161,15,0:27
		/Users/zoe/Desktop/bee2.9/test.raw.vcf:gi|313880010|gb|AELG01002224.1| 30824 . A G 203 . DP=25;VDB=1.385411e-01;RPB=1.822160e+00;AF1=0.5;AC1=1;DP4=5,7,7,6;MQ=37;FQ=198;PV4=0.7,0.19,1,0.19 GT:PL:DP:GQ 0/1:233,0,226:25:99
		/Users/zoe/Desktop/bee1.11/test.raw.vcf:gi|313880010|gb|AELG01002224.1| 30824 . A G 128 . DP=5;VDB=8.616185e-02;AF1=1;AC1=2;DP4=0,0,2,3;MQ=37;FQ=-42 GT:PL:GQ 1/1:161,15,0:27
AELG01002621.1	mre|85071|1/1:39:7:154,21,0|0/0:NA|1/1:93:16:255,48,0	/Users/zoe/Desktop/MarkRW7/test.raw.vcf:gi|313879594|gb|AELG01002621.1| 85071 . C T 42.8 . DP=2;VDB=7.840000e-02;AF1=1;AC1=2;DP4=0,0,1,1;MQ=37;FQ=-33 GT:PL:DP:GQ 1/1:74,6,0:2:10
		/Users/zoe/Desktop/MarkNRW8/test.raw.vcf:gi|313879594|gb|AELG01002621.1| 85071 . C T 103 . DP=5;VDB=6.522045e-02;AF1=1;AC1=2;DP4=0,0,1,4;MQ=37;FQ=-42 GT:PL:DP:GQ 1/1:136,15,0:5:27
		/Users/zoe/Desktop/bee1.3/test.raw.vcf:gi|313879594|gb|AELG01002621.1| 85071 . C T 42.8 . DP=2;VDB=4.320000e-02;AF1=1;AC1=2;DP4=0,0,1,1;MQ=37;FQ=-33 GT:PL:DP:GQ 1/1:74,6,0:2:10
		/Users/zoe/Desktop/bee1.7/test.raw.vcf:gi|313879594|gb|AELG01002621.1| 85071 . C T 35.8 . DP=2;VDB=6.400000e-02;AF1=1;AC1=2;DP4=0,0,0,2;MQ=37;FQ=-33 GT:PL:GQ 1/1:67,6,0:10
		/Users/zoe/Desktop/bee2.9/test.raw.vcf:gi|313879594|gb|AELG01002621.1| 85071 . C T 175 . DP=9;VDB=1.091397e-02;AF1=1;AC1=2;DP4=0,0,2,6;MQ=37;FQ=-51 GT:PL:DP:GQ 1/1:208,24,0:8:45
AELG01003249.1	medip|647|1/1:45:8:208,24,0|1/1:12:7:148,7,0|0/0:NA	-
AELG01003672.1	mre|34537|1/1:33:6:185,18,0|0/0:NA|1/1:45:8:227,24,0	/Users/zoe/Desktop/Mark010/test.raw.vcf:gi|313878519|gb|AELG01003672.1| 34537 . T C 42.8 . DP=2;VDB=5.120000e-02;AF1=1;AC1=2;DP4=0,0,1,1;MQ=37;FQ=-33 GT:PL:DP:GQ 1/1:74,6,0:2:10
		/Users/zoe/Desktop/Mark011/test.raw.vcf:gi|313878519|gb|AELG01003672.1| 34537 . T C 42.8 . DP=2;VDB=6.560000e-02;AF1=1;AC1=2;DP4=0,0,1,1;MQ=37;FQ=-33 GT:PL:DP:GQ 1/1:74,6,0:2:10
		/Users/zoe/Desktop/MarkNRW8/test.raw.vcf:gi|313878519|gb|AELG01003672.1| 34537 . T C 73 . DP=3;VDB=6.086650e-02;AF1=1;AC1=2;DP4=0,0,1,2;MQ=37;FQ=-36 GT:PL:DP:GQ 1/1:105,9,0:3:16
		/Users/zoe/Desktop/bee2.9/test.raw.vcf:gi|313878519|gb|AELG01003672.1| 34537 . T C 97.5 . DP=4;VDB=5.619835e-02;AF1=1;AC1=2;DP4=0,0,2,2;MQ=37;FQ=-39 GT:PL:DP:GQ 1/1:130,12,0:4:21
AELG01004342.1	medip|152075|0/0:NA|0/0:NA|1/1:32:6:59,18,0	-
AELG01004467.1	medip|3372|0/0:NA|0/0:NA|1/1:9:18:183,5,0	-
AELG01004618.1	medip|50955|1/1:99:30:255,90,0|1/1:93:16:255,48,0|0/0:NA	/Users/zoe/Desktop/Mark010/test.raw.vcf:gi|313877043|gb|AELG01004618.1| 50955 . T C 120 . DP=5;VDB=9.266921e-02;AF1=1;AC1=2;DP4=0,0,3,2;MQ=37;FQ=-42 GT:PL:DP:GQ 1/1:153,15,0:5:27
		/Users/zoe/Desktop/Mark011/test.raw.vcf:gi|313877043|gb|AELG01004618.1| 50955 . T C 97.5 . DP=4;VDB=7.864627e-02;AF1=1;AC1=2;DP4=0,0,1,3;MQ=37;FQ=-39 GT:PL:DP:GQ 1/1:130,12,0:4:21
		/Users/zoe/Desktop/MarkRW7/test.raw.vcf:gi|313877043|gb|AELG01004618.1| 50955 . T C 147 . DP=7;VDB=5.105456e-02;AF1=1;AC1=2;DP4=0,0,1,6;MQ=37;FQ=-48 GT:PL:DP:GQ 1/1:180,21,0:7:39
		/Users/zoe/Desktop/MarkNRW8/test.raw.vcf:gi|313877043|gb|AELG01004618.1| 50955 . T C 40.8 . DP=3;VDB=3.200000e-02;AF1=1;AC1=2;DP4=0,0,1,1;MQ=37;FQ=-33 GT:PL:DP:GQ 1/1:72,6,0:2:10
		/Users/zoe/Desktop/MarkNRW9/test.raw.vcf:gi|313877043|gb|AELG01004618.1| 50955 . T C 34.8 . DP=2;VDB=7.680000e-02;AF1=1;AC1=2;DP4=0,0,0,2;MQ=37;FQ=-33 GT:PL:DP:GQ 1/1:66,6,0:2:10
		/Users/zoe/Desktop/bee1.2/test.raw.vcf:gi|313877043|gb|AELG01004618.1| 50955 . T C 62 . DP=4;VDB=5.085621e-02;AF1=1;AC1=2;DP4=0,0,2,1;MQ=33;FQ=-36 GT:PL:DP:GQ 1/1:94,9,0:3:16
		/Users/zoe/Desktop/bee1.3/test.raw.vcf:gi|313877043|gb|AELG01004618.1| 50955 . T C 103 . DP=4;VDB=8.050644e-02;AF1=1;AC1=2;DP4=0,0,2,2;MQ=37;FQ=-39 GT:PL:DP:GQ 1/1:135,12,0:4:21
		/Users/zoe/Desktop/bee1.4/test.raw.vcf:gi|313877043|gb|AELG01004618.1| 50955 . T C 35.8 . DP=3;VDB=7.360000e-02;AF1=1;AC1=2;DP4=0,0,0,2;MQ=37;FQ=-33 GT:PL:DP:GQ 1/1:67,6,0:2:10
		/Users/zoe/Desktop/bee1.6/test.raw.vcf:gi|313877043|gb|AELG01004618.1| 50955 . T C 97.5 . DP=4;VDB=7.549815e-02;AF1=1;AC1=2;DP4=0,0,1,3;MQ=37;FQ=-39 GT:PL:DP:GQ 1/1:130,12,0:4:21
		/Users/zoe/Desktop/bee1.7/test.raw.vcf:gi|313877043|gb|AELG01004618.1| 50955 . T C 42.8 . DP=2;VDB=7.360000e-02;AF1=1;AC1=2;DP4=0,0,1,1;MQ=37;FQ=-33 GT:PL:GQ 1/1:74,6,0:10
		/Users/zoe/Desktop/bee1.11/test.raw.vcf:gi|313877043|gb|AELG01004618.1| 50955 . T C 31.8 . DP=2;VDB=5.280000e-02;AF1=1;AC1=2;DP4=0,0,2,0;MQ=37;FQ=-33 GT:PL:GQ 1/1:63,6,0:10
		/Users/zoe/Desktop/bee2.9/test.raw.vcf:gi|313877043|gb|AELG01004618.1| 50955 . T C 165 . DP=9;VDB=1.147958e-01;AF1=1;AC1=2;DP4=0,0,2,6;MQ=37;FQ=-51 GT:PL:DP:GQ 1/1:198,24,0:8:45
		/Users/zoe/Desktop/bee1.11/test.raw.vcf:gi|313877043|gb|AELG01004618.1| 50955 . T C 31.8 . DP=2;VDB=5.280000e-02;AF1=1;AC1=2;DP4=0,0,2,0;MQ=37;FQ=-33 GT:PL:GQ 1/1:63,6,0:10
AELG01005399.1	medip|63410|1/1:45:8:212,24,0|1/1:39:7:190,21,0|0/0:NA	/Users/zoe/Desktop/MarkNRW8/test.raw.vcf:gi|313876243|gb|AELG01005399.1| 63410 . C A 40.8 . DP=2;VDB=3.680000e-02;AF1=1;AC1=2;DP4=0,0,1,1;MQ=37;FQ=-33 GT:PL:DP:GQ 1/1:72,6,0:2:10
AELG01006475.1	medip|1492|0/0:NA|0/0:NA|1/1:39:7:195,21,0	/Users/zoe/Desktop/MarkNRW8/test.raw.vcf:gi|313875158|gb|AELG01006475.1| 1492 . A G 73 . DP=21;VDB=6.102519e-02;RPB=-5.367199e-01;AF1=0.5;AC1=1;DP4=10,6,2,3;MQ=37;FQ=76;PV4=0.61,0.25,1,0.17 GT:PL:DP:GQ 0/1:103,0,255:21:99
