# Supplementary material for: Allele specific expression and methylation in the bumblebee, Bombus terrestris
Source: PeerJ. 2017 Sep 13;5:e3798. doi: 10.7717/peerj.3798 (PMC5600721; doi:10.7717/peerj.3798)
Supplement: Table S3 — This table details the blast results from both the bumblebee and drosophila genomes and the GO terms associated with the drosophila hits. [file peerj-05-3798-s003.xlsx]

## Sheet: Sheet1
SNP	blastn (Bombus terrestris)			blastx (Drosophila melanogaster)
	Sequence Description	eValue	Accession Number	Sequence Description	eValue	Gene Name	GO Names
gi|313870964|gb|AELG01010669.1|_1056	---NA---	NA		---NA---	NA
gi|313870964|gb|AELG01010669.1|_446	---NA---	NA		---NA---	NA
gi|313870964|gb|AELG01010669.1|_473	---NA---	NA		---NA---	NA
gi|313870964|gb|AELG01010669.1|_677	---NA---	NA		---NA---	NA
gi|313870964|gb|AELG01010669.1|_718	---NA---	NA		---NA---	NA
gi|313870964|gb|AELG01010669.1|_753	---NA---	NA		---NA---	NA
gi|313871004|gb|AELG01010629.1|_123	---NA---	NA		---NA---	NA
gi|313871004|gb|AELG01010629.1|_249	---NA---	NA		---NA---	NA
gi|313871004|gb|AELG01010629.1|_289	---NA---	NA		---NA---	NA
gi|313871046|gb|AELG01010587.1|_833	---NA---	NA		---NA---	NA
gi|313871062|gb|AELG01010571.1|_137	---NA---	NA		---NA---	NA
gi|313871062|gb|AELG01010571.1|_160	---NA---	NA		---NA---	NA
gi|313871153|gb|AELG01010480.1|_351	---NA---	NA		GAGXE_DROME ame: Full=Nucleic-acid-binding from transposon X-element	7.2e-21
gi|313871265|gb|AELG01010368.1|_1168	---NA---	NA		isoform A	5.5e-05
gi|313871265|gb|AELG01010368.1|_1197	---NA---	NA		isoform A	5.5e-05
gi|313871265|gb|AELG01010368.1|_1202	---NA---	NA		isoform A	5.5e-05
gi|313871265|gb|AELG01010368.1|_318	---NA---	NA		isoform A	5.5e-05
gi|313871270|gb|AELG01010363.1|_239	---NA---	NA		---NA---	NA
gi|313871270|gb|AELG01010363.1|_244	---NA---	NA		---NA---	NA
gi|313871270|gb|AELG01010363.1|_274	---NA---	NA		---NA---	NA
gi|313871270|gb|AELG01010363.1|_312	---NA---	NA		---NA---	NA
gi|313871304|gb|AELG01010329.1|_674	---NA---	NA		---NA---	NA
gi|313871346|gb|AELG01010287.1|_42	---NA---	NA		---NA---	NA
gi|313871346|gb|AELG01010287.1|_62	---NA---	NA		---NA---	NA
gi|313871346|gb|AELG01010287.1|_92	---NA---	NA		---NA---	NA
gi|313871359|gb|AELG01010274.1|_1062	---NA---	NA		CG10206	1e-50
gi|313871359|gb|AELG01010274.1|_659	---NA---	NA		CG10206	1e-50
gi|313871362|gb|AELG01010271.1|_132	---NA---	NA		RE03814p	8.3e-11
gi|313871362|gb|AELG01010271.1|_140	---NA---	NA		RE03814p	8.3e-11
gi|313871362|gb|AELG01010271.1|_152	---NA---	NA		RE03814p	8.3e-11
gi|313871362|gb|AELG01010271.1|_161	---NA---	NA		RE03814p	8.3e-11
gi|313871362|gb|AELG01010271.1|_183	---NA---	NA		RE03814p	8.3e-11
gi|313871362|gb|AELG01010271.1|_328	---NA---	NA		RE03814p	8.3e-11
gi|313871362|gb|AELG01010271.1|_356	---NA---	NA		RE03814p	8.3e-11
gi|313871362|gb|AELG01010271.1|_381	---NA---	NA		RE03814p	8.3e-11
gi|313871362|gb|AELG01010271.1|_383	---NA---	NA		RE03814p	8.3e-11
gi|313871362|gb|AELG01010271.1|_414	---NA---	NA		RE03814p	8.3e-11
gi|313871362|gb|AELG01010271.1|_430	---NA---	NA		RE03814p	8.3e-11
gi|313871362|gb|AELG01010271.1|_458	---NA---	NA		RE03814p	8.3e-11
gi|313871362|gb|AELG01010271.1|_459	---NA---	NA		RE03814p	8.3e-11
gi|313871362|gb|AELG01010271.1|_462	---NA---	NA		RE03814p	8.3e-11
gi|313871362|gb|AELG01010271.1|_466	---NA---	NA		RE03814p	8.3e-11
gi|313871362|gb|AELG01010271.1|_482	---NA---	NA		RE03814p	8.3e-11
gi|313871362|gb|AELG01010271.1|_487	---NA---	NA		RE03814p	8.3e-11
gi|313871372|gb|AELG01010261.1|_523	---NA---	NA		RTXE_DROME ame: Full=Probable RNA-directed DNA polymerase from transposon X-element ame: Full=Reverse transcriptase	3.3e-42
gi|313871432|gb|AELG01010201.1|_825	---NA---	NA		---NA---	NA
gi|313871444|gb|AELG01010189.1|_204	---NA---	NA		---NA---	NA
gi|313871444|gb|AELG01010189.1|_224	---NA---	NA		---NA---	NA
gi|313871444|gb|AELG01010189.1|_268	---NA---	NA		---NA---	NA
gi|313871444|gb|AELG01010189.1|_299	---NA---	NA		---NA---	NA
gi|313871444|gb|AELG01010189.1|_318	---NA---	NA		---NA---	NA
gi|313871444|gb|AELG01010189.1|_324	---NA---	NA		---NA---	NA
gi|313871444|gb|AELG01010189.1|_338	---NA---	NA		---NA---	NA
gi|313871444|gb|AELG01010189.1|_68	---NA---	NA		---NA---	NA
gi|313871444|gb|AELG01010189.1|_69	---NA---	NA		---NA---	NA
gi|313871543|gb|AELG01010090.1|_304	---NA---	NA		CG8132- partial	3.2e-19	CG8132	nitrilase activity nitrogen compound metabolic process
gi|313871543|gb|AELG01010090.1|_314	---NA---	NA		CG8132- partial	3.2e-19	CG8132	nitrilase activity nitrogen compound metabolic process
gi|313871543|gb|AELG01010090.1|_686	---NA---	NA		CG8132- partial	3.2e-19	CG8132	nitrilase activity nitrogen compound metabolic process
gi|313871543|gb|AELG01010090.1|_708	---NA---	NA		CG8132- partial	3.2e-19	CG8132	nitrilase activity nitrogen compound metabolic process
gi|313871567|gb|AELG01010066.1|_165	---NA---	NA		---NA---	NA
gi|313871567|gb|AELG01010066.1|_437	---NA---	NA		---NA---	NA
gi|313871567|gb|AELG01010066.1|_99	---NA---	NA		---NA---	NA
gi|313871662|gb|AELG01009971.1|_135	---NA---	NA		RE03814p	3.7e-10
gi|313871675|gb|AELG01009958.1|_117	---NA---	NA		---NA---	NA
gi|313871675|gb|AELG01009958.1|_160	---NA---	NA		---NA---	NA
gi|313871675|gb|AELG01009958.1|_177	---NA---	NA		---NA---	NA
gi|313871675|gb|AELG01009958.1|_182	---NA---	NA		---NA---	NA
gi|313871675|gb|AELG01009958.1|_323	---NA---	NA		---NA---	NA
gi|313871675|gb|AELG01009958.1|_344	---NA---	NA		---NA---	NA
gi|313871675|gb|AELG01009958.1|_362	---NA---	NA		---NA---	NA
gi|313871675|gb|AELG01009958.1|_365	---NA---	NA		---NA---	NA
gi|313871675|gb|AELG01009958.1|_412	---NA---	NA		---NA---	NA
gi|313871675|gb|AELG01009958.1|_425	---NA---	NA		---NA---	NA
gi|313871675|gb|AELG01009958.1|_434	---NA---	NA		---NA---	NA
gi|313871675|gb|AELG01009958.1|_444	---NA---	NA		---NA---	NA
gi|313871675|gb|AELG01009958.1|_59	---NA---	NA		---NA---	NA
gi|313871675|gb|AELG01009958.1|_65	---NA---	NA		---NA---	NA
gi|313871675|gb|AELG01009958.1|_90	---NA---	NA		---NA---	NA
gi|313871683|gb|AELG01009950.1|_492	---NA---	NA		CG32069- partial	1.6e-05	DsecGM24783 DyakGE20246 CG32069
gi|313871683|gb|AELG01009950.1|_494	---NA---	NA		CG32069- partial	1.6e-05	DsecGM24783 DyakGE20246 CG32069
gi|313871683|gb|AELG01009950.1|_682	---NA---	NA		CG32069- partial	1.6e-05	DsecGM24783 DyakGE20246 CG32069
gi|313871800|gb|AELG01009833.1|_126	---NA---	NA		6-phosphofructo-2- isoform A	9.2e-16	Pfrx	carbohydrate metabolic process phosphate-containing compound metabolic process imaginal disc-derived wing morphogenesis
gi|313871800|gb|AELG01009833.1|_143	---NA---	NA		6-phosphofructo-2- isoform A	9.2e-16	Pfrx	carbohydrate metabolic process phosphate-containing compound metabolic process imaginal disc-derived wing morphogenesis
gi|313871800|gb|AELG01009833.1|_190	---NA---	NA		6-phosphofructo-2- isoform A	9.2e-16	Pfrx	carbohydrate metabolic process phosphate-containing compound metabolic process imaginal disc-derived wing morphogenesis
gi|313871800|gb|AELG01009833.1|_265	---NA---	NA		6-phosphofructo-2- isoform A	9.2e-16	Pfrx	carbohydrate metabolic process phosphate-containing compound metabolic process imaginal disc-derived wing morphogenesis
gi|313871800|gb|AELG01009833.1|_417	---NA---	NA		6-phosphofructo-2- isoform A	9.2e-16	Pfrx	carbohydrate metabolic process phosphate-containing compound metabolic process imaginal disc-derived wing morphogenesis
gi|313871804|gb|AELG01009829.1|_270	---NA---	NA		---NA---	NA
gi|313871866|gb|AELG01009767.1|_53	---NA---	NA		GH20809p	4e-06
gi|313871866|gb|AELG01009767.1|_99	---NA---	NA		GH20809p	4e-06
gi|313871870|gb|AELG01009763.1|_360	---NA---	NA		---NA---	NA
gi|313871870|gb|AELG01009763.1|_433	---NA---	NA		---NA---	NA
gi|313871955|gb|AELG01009678.1|_564	---NA---	NA		---NA---	NA
gi|313871994|gb|AELG01009639.1|_516	---NA---	NA		---NA---	NA
gi|313871994|gb|AELG01009639.1|_628	---NA---	NA		---NA---	NA
gi|313872199|gb|AELG01009434.1|_418	---NA---	NA		---NA---	NA
gi|313872212|gb|AELG01009421.1|_1379	---NA---	NA		---NA---	NA
gi|313872277|gb|AELG01009356.1|_227	---NA---	NA		RE37382p	7e-08
gi|313872277|gb|AELG01009356.1|_230	---NA---	NA		RE37382p	7e-08
gi|313872277|gb|AELG01009356.1|_250	---NA---	NA		RE37382p	7e-08
gi|313872277|gb|AELG01009356.1|_312	---NA---	NA		RE37382p	7e-08
gi|313872277|gb|AELG01009356.1|_313	---NA---	NA		RE37382p	7e-08
gi|313872277|gb|AELG01009356.1|_370	---NA---	NA		RE37382p	7e-08
gi|313872281|gb|AELG01009352.1|_1210	---NA---	NA		---NA---	NA
gi|313872281|gb|AELG01009352.1|_1215	---NA---	NA		---NA---	NA
gi|313872281|gb|AELG01009352.1|_929	---NA---	NA		---NA---	NA
gi|313872296|gb|AELG01009337.1|_237	---NA---	NA		---NA---	NA
gi|313872296|gb|AELG01009337.1|_332	---NA---	NA		---NA---	NA
gi|313872296|gb|AELG01009337.1|_355	---NA---	NA		---NA---	NA
gi|313872296|gb|AELG01009337.1|_378	---NA---	NA		---NA---	NA
gi|313872296|gb|AELG01009337.1|_380	---NA---	NA		---NA---	NA
gi|313872296|gb|AELG01009337.1|_430	---NA---	NA		---NA---	NA
gi|313872375|gb|AELG01009258.1|_134	---NA---	NA		---NA---	NA
gi|313872375|gb|AELG01009258.1|_69	---NA---	NA		---NA---	NA
gi|313872427|gb|AELG01009206.1|_292	---NA---	NA		---NA---	NA
gi|313872427|gb|AELG01009206.1|_317	---NA---	NA		---NA---	NA
gi|313872443|gb|AELG01009190.1|_198	---NA---	NA		---NA---	NA
gi|313872443|gb|AELG01009190.1|_229	---NA---	NA		---NA---	NA
gi|313872443|gb|AELG01009190.1|_233	---NA---	NA		---NA---	NA
gi|313872443|gb|AELG01009190.1|_487	---NA---	NA		---NA---	NA
gi|313872443|gb|AELG01009190.1|_53	---NA---	NA		---NA---	NA
gi|313872443|gb|AELG01009190.1|_61	---NA---	NA		---NA---	NA
gi|313872443|gb|AELG01009190.1|_87	---NA---	NA		---NA---	NA
gi|313872523|gb|AELG01009110.1|_282	---NA---	NA		isoform A	7.5e-16	CG3609
gi|313872532|gb|AELG01009101.1|_398	---NA---	NA		---NA---	NA
gi|313872746|gb|AELG01008887.1|_369	---NA---	NA		CG30069	1.8e-119	CG30069	wing disc development
gi|313872746|gb|AELG01008887.1|_384	---NA---	NA		CG30069	1.8e-119	CG30069	wing disc development
gi|313872756|gb|AELG01008877.1|_280	---NA---	NA		---NA---	NA
gi|313872756|gb|AELG01008877.1|_389	---NA---	NA		---NA---	NA
gi|313872756|gb|AELG01008877.1|_556	---NA---	NA		---NA---	NA
gi|313872764|gb|AELG01008869.1|_271	---NA---	NA		ORF	2e-06
gi|313872764|gb|AELG01008869.1|_54	---NA---	NA		ORF	2e-06
gi|313872821|gb|AELG01008812.1|_662	---NA---	NA		---NA---	NA
gi|313872821|gb|AELG01008812.1|_664	---NA---	NA		---NA---	NA
gi|313872821|gb|AELG01008812.1|_703	---NA---	NA		---NA---	NA
gi|313872821|gb|AELG01008812.1|_704	---NA---	NA		---NA---	NA
gi|313872821|gb|AELG01008812.1|_724	---NA---	NA		---NA---	NA
gi|313872830|gb|AELG01008803.1|_614	---NA---	NA		---NA---	NA
gi|313872833|gb|AELG01008800.1|_178	---NA---	NA		---NA---	NA
gi|313872833|gb|AELG01008800.1|_188	---NA---	NA		---NA---	NA
gi|313872965|gb|AELG01008668.1|_400	---NA---	NA		---NA---	NA
gi|313872965|gb|AELG01008668.1|_463	---NA---	NA		---NA---	NA
gi|313872965|gb|AELG01008668.1|_659	---NA---	NA		---NA---	NA
gi|313872965|gb|AELG01008668.1|_674	---NA---	NA		---NA---	NA
gi|313872965|gb|AELG01008668.1|_707	---NA---	NA		---NA---	NA
gi|313873064|gb|AELG01008569.1|_1006	---NA---	NA		---NA---	NA
gi|313873122|gb|AELG01008511.1|_483	---NA---	NA		---NA---	NA
gi|313873153|gb|AELG01008480.1|_174	---NA---	NA		isoform A	0.00067
gi|313873153|gb|AELG01008480.1|_281	---NA---	NA		isoform A	0.00067
gi|313873153|gb|AELG01008480.1|_461	---NA---	NA		isoform A	0.00067
gi|313873153|gb|AELG01008480.1|_463	---NA---	NA		isoform A	0.00067
gi|313873153|gb|AELG01008480.1|_50	---NA---	NA		isoform A	0.00067
gi|313873153|gb|AELG01008480.1|_582	---NA---	NA		isoform A	0.00067
gi|313873243|gb|AELG01008390.1|_512	---NA---	NA		cytochrome c oxidase subunit I	5.6e-35
gi|313873268|gb|AELG01008365.1|_275	---NA---	NA		SD06427p	8.7e-114
gi|313873268|gb|AELG01008365.1|_378	---NA---	NA		SD06427p	8.7e-114
gi|313873298|gb|AELG01008335.1|_1001	---NA---	NA		---NA---	NA
gi|313873298|gb|AELG01008335.1|_659	---NA---	NA		---NA---	NA
gi|313873307|gb|AELG01008326.1|_65	---NA---	NA		---NA---	NA
gi|313873342|gb|AELG01008291.1|_477	---NA---	NA		---NA---	NA
gi|313873425|gb|AELG01008208.1|_456	---NA---	NA		---NA---	NA
gi|313873426|gb|AELG01008207.1|_375	---NA---	NA		RE17942p	6.5e-09
gi|313873426|gb|AELG01008207.1|_437	---NA---	NA		RE17942p	6.5e-09
gi|313873426|gb|AELG01008207.1|_450	---NA---	NA		RE17942p	6.5e-09
gi|313873426|gb|AELG01008207.1|_465	---NA---	NA		RE17942p	6.5e-09
gi|313873470|gb|AELG01008163.1|_161	---NA---	NA		---NA---	NA
gi|313873470|gb|AELG01008163.1|_171	---NA---	NA		---NA---	NA
gi|313873532|gb|AELG01008101.1|_65	---NA---	NA		---NA---	NA
gi|313873532|gb|AELG01008101.1|_68	---NA---	NA		---NA---	NA
gi|313873534|gb|AELG01008099.1|_114	---NA---	NA		---NA---	NA
gi|313873534|gb|AELG01008099.1|_136	---NA---	NA		---NA---	NA
gi|313873534|gb|AELG01008099.1|_365	---NA---	NA		---NA---	NA
gi|313873599|gb|AELG01008034.1|_131	---NA---	NA		S68526_1pol poly	4.5e-05
gi|313873681|gb|AELG01007952.1|_779	---NA---	NA		---NA---	NA
gi|313873693|gb|AELG01007940.1|_247	---NA---	NA		GM07634p	3.5e-14
gi|313873693|gb|AELG01007940.1|_324	---NA---	NA		GM07634p	3.5e-14
gi|313873693|gb|AELG01007940.1|_347	---NA---	NA		GM07634p	3.5e-14
gi|313873697|gb|AELG01007936.1|_178	---NA---	NA		---NA---	NA
gi|313873697|gb|AELG01007936.1|_258	---NA---	NA		---NA---	NA
gi|313873751|gb|AELG01007882.1|_254	---NA---	NA		---NA---	NA
gi|313873785|gb|AELG01007848.1|_123	---NA---	NA		isoform A	1.3e-18
gi|313873785|gb|AELG01007848.1|_176	---NA---	NA		isoform A	1.3e-18
gi|313873785|gb|AELG01007848.1|_288	---NA---	NA		isoform A	1.3e-18
gi|313873790|gb|AELG01007843.1|_247	---NA---	NA		---NA---	NA
gi|313873813|gb|AELG01007820.1|_1307	---NA---	NA		ribosomal S6	4.6e-52	RpS6	cytosolic small ribosomal subunit structural constituent of ribosome mitotic spindle elongation rRNA processing translation immune response ribosomal small subunit biogenesis centrosome duplication
gi|313873813|gb|AELG01007820.1|_1369	---NA---	NA		ribosomal S6	1.8e-51	RpS6	cytosolic small ribosomal subunit structural constituent of ribosome mitotic spindle elongation rRNA processing translation immune response ribosomal small subunit biogenesis centrosome duplication
gi|313873987|gb|AELG01007646.1|_265	---NA---	NA		---NA---	NA
gi|313873987|gb|AELG01007646.1|_291	---NA---	NA		---NA---	NA
gi|313873987|gb|AELG01007646.1|_294	---NA---	NA		---NA---	NA
gi|313874243|gb|AELG01007390.1|_168	---NA---	NA		---NA---	NA
gi|313874243|gb|AELG01007390.1|_188	---NA---	NA		---NA---	NA
gi|313874243|gb|AELG01007390.1|_457	---NA---	NA		---NA---	NA
gi|313874739|gb|AELG01006894.1|_427	---NA---	NA		---NA---	NA
gi|313874834|gb|AELG01006799.1|_236	---NA---	NA		coat (coatomer) isoform A	4.8e-180	alphaCOP	COPI vesicle coat structural molecule activity intracellular protein transport retrograde vesicle-mediated transport, Golgi to ER phagocytosis male meiosis cytokinesis regulation of lipid storage neuron projection morphogenesis
gi|313874834|gb|AELG01006799.1|_259	---NA---	NA		coat (coatomer) isoform A	4.8e-180	alphaCOP	COPI vesicle coat structural molecule activity intracellular protein transport retrograde vesicle-mediated transport, Golgi to ER phagocytosis male meiosis cytokinesis regulation of lipid storage neuron projection morphogenesis
gi|313874834|gb|AELG01006799.1|_263	---NA---	NA		coat (coatomer) isoform A	4.8e-180	alphaCOP	COPI vesicle coat structural molecule activity intracellular protein transport retrograde vesicle-mediated transport, Golgi to ER phagocytosis male meiosis cytokinesis regulation of lipid storage neuron projection morphogenesis
gi|313874834|gb|AELG01006799.1|_307	---NA---	NA		coat (coatomer) isoform A	3.2e-180	alphaCOP	COPI vesicle coat structural molecule activity intracellular protein transport retrograde vesicle-mediated transport, Golgi to ER phagocytosis male meiosis cytokinesis regulation of lipid storage neuron projection morphogenesis
gi|313874834|gb|AELG01006799.1|_381	---NA---	NA		coat (coatomer) isoform A	3.2e-180	alphaCOP	COPI vesicle coat structural molecule activity intracellular protein transport retrograde vesicle-mediated transport, Golgi to ER phagocytosis male meiosis cytokinesis regulation of lipid storage neuron projection morphogenesis
gi|313874834|gb|AELG01006799.1|_462	---NA---	NA		coat (coatomer) isoform A	3.2e-180	alphaCOP	COPI vesicle coat structural molecule activity intracellular protein transport retrograde vesicle-mediated transport, Golgi to ER phagocytosis male meiosis cytokinesis regulation of lipid storage neuron projection morphogenesis
gi|313874834|gb|AELG01006799.1|_467	---NA---	NA		coat (coatomer) isoform A	3.2e-180	alphaCOP	COPI vesicle coat structural molecule activity intracellular protein transport retrograde vesicle-mediated transport, Golgi to ER phagocytosis male meiosis cytokinesis regulation of lipid storage neuron projection morphogenesis
gi|313874835|gb|AELG01006798.1|_686	---NA---	NA		coat (coatomer) isoform A	1.1e-124	alphaCOP	COPI vesicle coat structural molecule activity intracellular protein transport retrograde vesicle-mediated transport, Golgi to ER phagocytosis male meiosis cytokinesis regulation of lipid storage neuron projection morphogenesis
gi|313874970|gb|AELG01006663.1|_308	Bombus terrestris WD repeat-containing 36-like (LOC105667016) partial mRNA	3.7e-20	XM_012320063	SD06427p	1.6e-26
gi|313875037|gb|AELG01006596.1|_171	---NA---	NA		---NA---	NA
gi|313875037|gb|AELG01006596.1|_242	Bombus terrestris uncharacterized LOC105667086 (LOC105667086) partial mRNA	3.7e-20	XM_012320152	---NA---	NA
gi|313875037|gb|AELG01006596.1|_284	---NA---	NA		---NA---	NA
gi|313875037|gb|AELG01006596.1|_447	---NA---	NA		---NA---	NA
gi|313875048|gb|AELG01006585.1|_606	---NA---	NA		POL4_DROME ame: Full=Retrovirus-related Pol poly from transposon 412 Includes: ame: Full=Protease Includes: ame: Full=Reverse transcriptase Includes: ame: Full=Endonuclease	1.3e-08
gi|313875048|gb|AELG01006585.1|_647	---NA---	NA		POL4_DROME ame: Full=Retrovirus-related Pol poly from transposon 412 Includes: ame: Full=Protease Includes: ame: Full=Reverse transcriptase Includes: ame: Full=Endonuclease	1.3e-08
gi|313875174|gb|AELG01006459.1|_1238	---NA---	NA		blastopia poly	4.3e-08
gi|313875220|gb|AELG01006413.1|_132	---NA---	NA		---NA---	NA
gi|313875220|gb|AELG01006413.1|_137	---NA---	NA		---NA---	NA
gi|313875220|gb|AELG01006413.1|_24	---NA---	NA		---NA---	NA
gi|313875220|gb|AELG01006413.1|_301	---NA---	NA		---NA---	NA
gi|313875220|gb|AELG01006413.1|_358	---NA---	NA		---NA---	NA
gi|313875220|gb|AELG01006413.1|_371	---NA---	NA		---NA---	NA
gi|313875220|gb|AELG01006413.1|_390	---NA---	NA		---NA---	NA
gi|313875220|gb|AELG01006413.1|_490	---NA---	NA		---NA---	NA
gi|313875220|gb|AELG01006413.1|_506	---NA---	NA		---NA---	NA
gi|313875220|gb|AELG01006413.1|_510	---NA---	NA		---NA---	NA
gi|313875220|gb|AELG01006413.1|_52	---NA---	NA		---NA---	NA
gi|313875220|gb|AELG01006413.1|_70	---NA---	NA		---NA---	NA
gi|313875286|gb|AELG01006347.1|_1092	---NA---	NA		---NA---	NA
gi|313875286|gb|AELG01006347.1|_1216	---NA---	NA		---NA---	NA
gi|313875286|gb|AELG01006347.1|_382	---NA---	NA		---NA---	NA
gi|313875286|gb|AELG01006347.1|_793	---NA---	NA		---NA---	NA
gi|313875286|gb|AELG01006347.1|_863	Bombus terrestris uncharacterized LOC100648349 (LOC100648349) ncRNA	2.2e-12	XR_001099695	---NA---	NA
gi|313875358|gb|AELG01006275.1|_1541	---NA---	NA		---NA---	NA
gi|313875358|gb|AELG01006275.1|_1566	---NA---	NA		---NA---	NA
gi|313875358|gb|AELG01006275.1|_1680	---NA---	NA		---NA---	NA
gi|313875358|gb|AELG01006275.1|_1810	---NA---	NA		---NA---	NA
gi|313875358|gb|AELG01006275.1|_1870	---NA---	NA		---NA---	NA
gi|313875358|gb|AELG01006275.1|_1936	---NA---	NA		---NA---	NA
gi|313875379|gb|AELG01006254.1|_88191	Bombus terrestris uncharacterized LOC100645500 (LOC100645500) mRNA	3.7e-20	XM_003400232	---NA---	NA
gi|313875379|gb|AELG01006254.1|_88251	Bombus terrestris uncharacterized LOC100645500 (LOC100645500) mRNA	3.7e-20	XM_003400232	---NA---	NA
gi|313875379|gb|AELG01006254.1|_92029	Bombus terrestris uncharacterized LOC100645500 (LOC100645500) mRNA	3.7e-20	XM_003400232	isoform B	1.9e-23	CG43896
gi|313875395|gb|AELG01006238.1|_70589	Bombus terrestris histidine triad nucleotide-binding 1 (LOC105666409) mRNA	3.7e-20	XM_012315624	isoform A	1.8e-42	DsimGD23182 CG2862 DsecGM18366	nucleotidase activity metabolic process
gi|313875419|gb|AELG01006214.1|_14657	---NA---	NA		---NA---	NA
gi|313875441|gb|AELG01006192.1|_60050	---NA---	NA		C6A21_DROME ame: Full=Probable cytochrome P450 6a21 ame: Full=CYPVIA21	9.8e-33	Cyp6a21
gi|313875441|gb|AELG01006192.1|_62086	Bombus terrestris uncharacterized LOC100647549 (LOC100647549) mRNA	3.7e-20	XM_003400081	C6A21_DROME ame: Full=Probable cytochrome P450 6a21 ame: Full=CYPVIA21	9.8e-33	Cyp6a21
gi|313875441|gb|AELG01006192.1|_65443	Bombus terrestris cytochrome P450 6a2-like (LOC100647785) transcript variant mRNA	3.7e-20	XM_012315470	C6A13_DROME ame: Full=Probable cytochrome P450 6a13 ame: Full=CYPVIA13	1.3e-48	Cyp6a13
gi|313875441|gb|AELG01006192.1|_65462	Bombus terrestris cytochrome P450 6a2-like (LOC100647785) transcript variant mRNA	3.7e-20	XM_012315470	C6A13_DROME ame: Full=Probable cytochrome P450 6a13 ame: Full=CYPVIA13	1.3e-48	Cyp6a13
gi|313875446|gb|AELG01006187.1|_49672	---NA---	NA		microsomal triacylglycerol transfer	1.5e-84	Mtp	cell part anatomical structure morphogenesis primary metabolic process neuron development organic substance metabolic process
gi|313875749|gb|AELG01005885.1|_174056	Bombus terrestris transmembrane protease serine 9-like (LOC100644694) mRNA	3.7e-20	XM_003400059	CG3108	7.2e-30	CG3108	metallocarboxypeptidase activity
gi|313875780|gb|AELG01005854.1|_59809	Bombus terrestris probable chitinase 2 (LOC100649426) mRNA	1.7e-13	XM_003400589	chitinase isoform A	6.8e-77	Cht2	chitinase activity cuticle chitin catabolic process
gi|313875780|gb|AELG01005854.1|_61684	---NA---	NA		chitinase isoform A	6.8e-77	Cht2	chitinase activity cuticle chitin catabolic process
gi|313875780|gb|AELG01005854.1|_61687	Bombus terrestris probable chitinase 2 (LOC100649426) mRNA	2.9e-11	XM_003400589	chitinase isoform A	6.8e-77	Cht2	chitinase activity cuticle chitin catabolic process
gi|313875837|gb|AELG01005798.1|_43628	---NA---	NA		cytochrome b	9.4e-21
gi|313875864|gb|AELG01005771.1|_62391	---NA---	NA		isoform K	8e-42	Moe	nucleus actin filament adherens junction cell cortex apical plasma membrane extrinsic component of membrane cleavage furrow subapical complex fusome mitotic spindle midzone actin binding phosphatidylinositol-4,5-bisphosphate binding establishment of mitotic spindle orientation assembly of actomyosin apparatus involved in cytokinesis mitotic spindle organization metaphase/anaphase transition of mi…
gi|313875889|gb|AELG01005747.1|_11235	---NA---	NA		IP21982p	2.1e-24
gi|313875889|gb|AELG01005747.1|_11467	---NA---	NA		IP21982p	2.1e-24
gi|313875889|gb|AELG01005747.1|_11953	---NA---	NA		IP21982p	2.1e-24
gi|313875889|gb|AELG01005747.1|_9399	Bombus terrestris antichymotrypsin-2-like (LOC100648602) mRNA	3.7e-20	XM_003399139	IP21982p	2.1e-24
gi|313875889|gb|AELG01005747.1|_9525	Bombus terrestris antichymotrypsin-2-like (LOC100648602) mRNA	3.7e-20	XM_003399139	IP21982p	2.1e-24
gi|313875889|gb|AELG01005747.1|_9979	Bombus terrestris antichymotrypsin-2-like (LOC100648602) mRNA	2.2e-12	XM_003399139	IP21982p	2.1e-24
gi|313875890|gb|AELG01005746.1|_117654	---NA---	NA		serpin isoform F	7e-26	Spn42Da	negative regulation of proteolysis
gi|313875890|gb|AELG01005746.1|_117695	---NA---	NA		serpin isoform F	7e-26	Spn42Da	negative regulation of proteolysis
gi|313875937|gb|AELG01005699.1|_19592	Bombus terrestris glyoxylate reductase hydroxypyruvate reductase (LOC100647868) mRNA	3.7e-20	XM_003398972	CG1236- partial	1.1e-86	CG1236
gi|313875946|gb|AELG01005690.1|_55843	---NA---	NA		blastopia poly	0.00016
gi|313876055|gb|AELG01005582.1|_941	---NA---	NA		AF245515_1 Ran binding 11	1.5e-15	Ranbp11
gi|313876055|gb|AELG01005582.1|_978	---NA---	NA		AF245515_1 Ran binding 11	1.6e-15	Ranbp11
gi|313876056|gb|AELG01005581.1|_1162	Bombus terrestris 40S ribosomal S6-like (LOC100646070) mRNA	3.7e-20	XM_003399038	ribosomal S6	3.8e-31	RpS6	cytosolic small ribosomal subunit structural constituent of ribosome mitotic spindle elongation rRNA processing translation immune response ribosomal small subunit biogenesis centrosome duplication
gi|313876082|gb|AELG01005556.1|_1187	Bombus terrestris mediator of RNA polymerase II transcription subunit 9 (LOC100649043) mRNA	3.7e-20	XM_003403195	ribosomal isoform C	7.9e-115	RpL10	cytosolic large ribosomal subunit neuronal cell body structural constituent of ribosome mitotic spindle elongation translation sensory perception of pain centrosome duplication
gi|313876082|gb|AELG01005556.1|_3642	Bombus terrestris 60S ribosomal L10 (LOC100649244) mRNA	3.7e-20	XM_012319839	ribosomal isoform C	1.7e-116	RpL10	cytosolic large ribosomal subunit neuronal cell body structural constituent of ribosome mitotic spindle elongation translation sensory perception of pain centrosome duplication
gi|313876127|gb|AELG01005512.1|_419	---NA---	NA		AT25468p	3.9e-07
gi|313876178|gb|AELG01005462.1|_194	---NA---	NA		CG10206	5.3e-13
gi|313876178|gb|AELG01005462.1|_228	---NA---	NA		CG10206	5.3e-13
gi|313876178|gb|AELG01005462.1|_69	---NA---	NA		CG10206	5.3e-13
gi|313876203|gb|AELG01005438.1|_1283	Bombus terrestris coatomer subunit alpha-like (LOC100648009) partial mRNA	3.7e-20	XM_003393962	coat (coatomer) isoform A	0	alphaCOP	COPI vesicle coat retrograde vesicle-mediated transport, Golgi to ER phagocytosis male meiosis cytokinesis regulation of lipid storage neuron projection morphogenesis
gi|313876203|gb|AELG01005438.1|_1335	Bombus terrestris coatomer subunit alpha-like (LOC100648009) partial mRNA	3.7e-20	XM_003393962	coat (coatomer) isoform A	0	alphaCOP	COPI vesicle coat retrograde vesicle-mediated transport, Golgi to ER phagocytosis male meiosis cytokinesis regulation of lipid storage neuron projection morphogenesis
gi|313876203|gb|AELG01005438.1|_1338	Bombus terrestris coatomer subunit alpha-like (LOC100648009) partial mRNA	3.7e-20	XM_003393962	coat (coatomer) isoform A	0	alphaCOP	COPI vesicle coat retrograde vesicle-mediated transport, Golgi to ER phagocytosis male meiosis cytokinesis regulation of lipid storage neuron projection morphogenesis
gi|313876203|gb|AELG01005438.1|_1440	Bombus terrestris coatomer subunit alpha-like (LOC100648009) partial mRNA	3.7e-20	XM_003393962	coat (coatomer) isoform A	0	alphaCOP	COPI vesicle coat retrograde vesicle-mediated transport, Golgi to ER phagocytosis male meiosis cytokinesis regulation of lipid storage neuron projection morphogenesis
gi|313876203|gb|AELG01005438.1|_1457	Bombus terrestris coatomer subunit alpha-like (LOC100648009) partial mRNA	3.7e-20	XM_003393962	coat (coatomer) isoform A	0	alphaCOP	COPI vesicle coat retrograde vesicle-mediated transport, Golgi to ER phagocytosis male meiosis cytokinesis regulation of lipid storage neuron projection morphogenesis
gi|313876203|gb|AELG01005438.1|_1532	Bombus terrestris coatomer subunit alpha-like (LOC100648009) partial mRNA	3.7e-20	XM_003393962	coat (coatomer) isoform A	0	alphaCOP	COPI vesicle coat retrograde vesicle-mediated transport, Golgi to ER phagocytosis male meiosis cytokinesis regulation of lipid storage neuron projection morphogenesis
gi|313876203|gb|AELG01005438.1|_201	Bombus terrestris coatomer subunit alpha-like (LOC100648009) partial mRNA	3.7e-20	XM_003393962	coat (coatomer) isoform A	0	alphaCOP	COPI vesicle coat retrograde vesicle-mediated transport, Golgi to ER phagocytosis male meiosis cytokinesis regulation of lipid storage neuron projection morphogenesis
gi|313876203|gb|AELG01005438.1|_355	Bombus terrestris coatomer subunit alpha-like (LOC100648009) partial mRNA	3.7e-20	XM_003393962	coat (coatomer) isoform A	0	alphaCOP	COPI vesicle coat retrograde vesicle-mediated transport, Golgi to ER phagocytosis male meiosis cytokinesis regulation of lipid storage neuron projection morphogenesis
gi|313876203|gb|AELG01005438.1|_363	Bombus terrestris coatomer subunit alpha-like (LOC100648009) partial mRNA	3.7e-20	XM_003393962	coat (coatomer) isoform A	0	alphaCOP	COPI vesicle coat retrograde vesicle-mediated transport, Golgi to ER phagocytosis male meiosis cytokinesis regulation of lipid storage neuron projection morphogenesis
gi|313876203|gb|AELG01005438.1|_433	Bombus terrestris coatomer subunit alpha-like (LOC100648009) partial mRNA	3.7e-20	XM_003393962	coat (coatomer) isoform A	0	alphaCOP	COPI vesicle coat retrograde vesicle-mediated transport, Golgi to ER phagocytosis male meiosis cytokinesis regulation of lipid storage neuron projection morphogenesis
gi|313876203|gb|AELG01005438.1|_477	Bombus terrestris coatomer subunit alpha-like (LOC100648009) partial mRNA	3.7e-20	XM_003393962	coat (coatomer) isoform A	0	alphaCOP	COPI vesicle coat retrograde vesicle-mediated transport, Golgi to ER phagocytosis male meiosis cytokinesis regulation of lipid storage neuron projection morphogenesis
gi|313876203|gb|AELG01005438.1|_540	Bombus terrestris coatomer subunit alpha-like (LOC100648009) partial mRNA	3.7e-20	XM_003393962	coat (coatomer) isoform A	0	alphaCOP	COPI vesicle coat retrograde vesicle-mediated transport, Golgi to ER phagocytosis male meiosis cytokinesis regulation of lipid storage neuron projection morphogenesis
gi|313876203|gb|AELG01005438.1|_720	Bombus terrestris coatomer subunit alpha-like (LOC100648009) partial mRNA	3.7e-20	XM_003393962	coat (coatomer) isoform A	0	alphaCOP	COPI vesicle coat retrograde vesicle-mediated transport, Golgi to ER phagocytosis male meiosis cytokinesis regulation of lipid storage neuron projection morphogenesis
gi|313876203|gb|AELG01005438.1|_846	Bombus terrestris coatomer subunit alpha-like (LOC100648009) partial mRNA	3.7e-20	XM_003393962	coat (coatomer) isoform A	0	alphaCOP	COPI vesicle coat retrograde vesicle-mediated transport, Golgi to ER phagocytosis male meiosis cytokinesis regulation of lipid storage neuron projection morphogenesis
gi|313876203|gb|AELG01005438.1|_987	Bombus terrestris coatomer subunit alpha-like (LOC100648009) partial mRNA	3.7e-20	XM_003393962	coat (coatomer) isoform A	0	alphaCOP	COPI vesicle coat retrograde vesicle-mediated transport, Golgi to ER phagocytosis male meiosis cytokinesis regulation of lipid storage neuron projection morphogenesis
gi|313876208|gb|AELG01005433.1|_48729	Bombus terrestris plastin-2 (LOC100649047) transcript variant mRNA	3.7e-20	XM_003393891	isoform C	1.8e-22	Fim	cytosol apical cortex contractile ring actin binding calcium ion binding female meiosis chromosome segregation
gi|313876208|gb|AELG01005433.1|_48734	Bombus terrestris plastin-2 (LOC100649047) transcript variant mRNA	3.7e-20	XM_003393891	isoform C	1.8e-22	Fim	cytosol apical cortex contractile ring actin binding calcium ion binding female meiosis chromosome segregation
gi|313876211|gb|AELG01005430.1|_69270	Bombus terrestris FAM98B (LOC100647606) mRNA	6.2e-18	XM_012320234	CG5913	2.1e-16	CG5913
gi|313876215|gb|AELG01005426.1|_24722	Bombus terrestris lethal(2)essential for life-like (LOC105667090) mRNA	3.7e-20	XM_012320215	GM22862p	5.1e-17
gi|313876244|gb|AELG01005398.1|_45480	Bombus terrestris cytochrome P450 9e2-like (LOC100649760) mRNA	3.7e-20	XM_003393817	C28D1_DROME ame: Full=Probable cytochrome P450 28d1 ame: Full=CYPXXVIIID1	4.4e-72	Cyp28d1
gi|313876244|gb|AELG01005398.1|_45515	Bombus terrestris cytochrome P450 9e2-like (LOC100649760) mRNA	3.7e-20	XM_003393817	C28D1_DROME ame: Full=Probable cytochrome P450 28d1 ame: Full=CYPXXVIIID1	4.4e-72	Cyp28d1
gi|313876244|gb|AELG01005398.1|_45948	Bombus terrestris cytochrome P450 9e2-like (LOC100649760) mRNA	3.7e-20	XM_003393817	C28D1_DROME ame: Full=Probable cytochrome P450 28d1 ame: Full=CYPXXVIIID1	4.4e-72	Cyp28d1
gi|313876244|gb|AELG01005398.1|_45990	Bombus terrestris cytochrome P450 9e2-like (LOC100649760) mRNA	3.7e-20	XM_003393817	C28D1_DROME ame: Full=Probable cytochrome P450 28d1 ame: Full=CYPXXVIIID1	4.4e-72	Cyp28d1
gi|313876273|gb|AELG01005370.1|_682	---NA---	NA		---NA---	NA
gi|313876329|gb|AELG01005316.1|_38854	Bombus terrestris TAR DNA-binding 43 (LOC100646812) transcript variant mRNA	3.7e-20	XM_012319677	TAR DNA-binding -43 isoform A	3.2e-42	TBPH	nucleus H zone perinuclear region of cytoplasm nucleotide binding single-stranded DNA binding mRNA binding GU repeat RNA binding neuromuscular synaptic transmission synapse assembly central nervous system development neuromuscular junction development adult walking behavior larval locomotory behavior regulation of glucose metabolic process negative regulation of RNA splicing regulation of intrace…
gi|313876452|gb|AELG01005195.1|_55	PREDICTED: Bombus terrestris uncharacterized protein DDB_G0271670-like (LOC100643897), transcript variant X2, mRNA	3.7e-20	XM_012312314	---NA---	NA
gi|313876453|gb|AELG01005194.1|_101991	PREDICTED: Bombus terrestris uncharacterized protein DDB_G0271670-like (LOC100643897), transcript variant X2, mRNA	3.7e-20	XM_012312314	---NA---	NA
gi|313876453|gb|AELG01005194.1|_41432	Bombus terrestris beta-glucuronidase-like (LOC100649299) transcript variant mRNA	3.7e-20	XM_012312311	---NA---	NA
gi|313876456|gb|AELG01005191.1|_9233	---NA---	NA		RE27528p	5.4e-127
gi|313876464|gb|AELG01005183.1|_38721	Bombus terrestris paternally-expressed gene 3 -like (LOC100648252) mRNA	3.7e-20	XM_012312274	CG6209	4.1e-08	CG6209	spliceosomal complex
gi|313876477|gb|AELG01005171.1|_15662	---NA---	NA		adaptor complex mu subunit	0	DanaGF16536 DsecGM26246 DyakGE24766 AP-1mu DereGG17361 DsimGD20786	synaptic vesicle AP-1 adaptor complex AP1 complex protein transporter activity clathrin binding intracellular protein transport neurotransmitter secretion synaptic vesicle coating sensory perception of pain secretory granule organization negative regulation of Notch signaling pathway compound eye development negative regulation of endocytic recycling
gi|313876502|gb|AELG01005146.1|_50332	Bombus terrestris cytochrome b5-like (LOC100648100) mRNA	3.7e-20	XM_003397757	Cyt-b5-PB	2.4e-22	Cyt-b5	lipid particle endomembrane system membrane intracellular membrane-bounded organelle electron carrier activity instar larval development regulation of hemocyte proliferation regulation of hemocyte differentiation regulation of cell cycle
gi|313876508|gb|AELG01005141.1|_1449	Bombus terrestris beta-hexosaminidase subunit beta-like (LOC100649144) mRNA	3.7e-20	XM_003397767	hexosaminidase isoform D	1.3e-28	Hexo1	beta-N-acetylhexosaminidase activity cellular protein modification process cellular biosynthetic process single-organism metabolic process single-organism cellular process
gi|313876546|gb|AELG01005104.1|_17531	Bombus terrestris uncharacterized LOC105666664 (LOC105666664) ncRNA	1.7e-18	XR_001099483	---NA---	NA
gi|313876677|gb|AELG01004975.1|_40184	Bombus terrestris 23 kDa integral membrane (LOC100651241) transcript variant mRNA	3.7e-20	XM_012321065	tetraspanin isoform A	5.6e-21	Tsp2A	integral component of membrane
gi|313876688|gb|AELG01004965.1|_40087	---NA---	NA		isoform A	1.8e-58	CG11665
gi|313876795|gb|AELG01004861.1|_18645	---NA---	NA		casein kinase I	6.4e-64
gi|313876800|gb|AELG01004856.1|_8110	Bombus terrestris uncharacterized LOC100646603 (LOC100646603) transcript variant mRNA	3.7e-20	XM_003400974	---NA---	NA
gi|313876804|gb|AELG01004852.1|_79106	---NA---	NA		IP22030p	6.7e-12
gi|313876879|gb|AELG01004779.1|_22270	Bombus terrestris 28S ribosomal mitochondrial (LOC100646266) mRNA	3.7e-20	XM_003398561	FI17103p1	3.2e-26
gi|313876950|gb|AELG01004710.1|_7697	---NA---	NA		endonuclease reverse transcriptase	8.8e-28
gi|313876950|gb|AELG01004710.1|_7911	---NA---	NA		endonuclease reverse transcriptase	2.5e-11
gi|313876950|gb|AELG01004710.1|_7990	---NA---	NA		endonuclease reverse transcriptase	2.5e-11
gi|313876950|gb|AELG01004710.1|_8086	---NA---	NA		POLR_DROME ame: Full=Retrovirus-related Pol poly from type-2 retrotransposable element R2DM ame: Full=Retrovirus-related Pol poly from type II retrotransposable element R2DM Includes: ame: Full=Protease Includes: ame: Full=Reverse transcriptase Includes: ame: Full=Endonuclease	4.2e-24
gi|313876962|gb|AELG01004698.1|_2132	---NA---	NA		---NA---	NA
gi|313876962|gb|AELG01004698.1|_3154	---NA---	NA		---NA---	NA
gi|313876972|gb|AELG01004688.1|_117833	Bombus terrestris mesh-like (LOC100644963) transcript variant mRNA	3.7e-20	XM_012309299	isoform A	2.4e-43	mesh	smooth septate junction smooth septate junction assembly
gi|313876977|gb|AELG01004683.1|_60735	Bombus terrestris maltase 1-like (LOC100643731) mRNA	3.7e-20	XM_003395866	IP13189p	4.6e-11
gi|313876977|gb|AELG01004683.1|_60836	Bombus terrestris maltase 1-like (LOC100643731) mRNA	3.7e-20	XM_003395866	IP13189p	4.6e-11
gi|313876977|gb|AELG01004683.1|_60885	Bombus terrestris maltase 1-like (LOC100643731) mRNA	3.7e-20	XM_003395866	IP13189p	4.6e-11
gi|313876977|gb|AELG01004683.1|_66070	Bombus terrestris maltase 1-like (LOC100643731) mRNA	3.7e-20	XM_003395866	maltase isoform A	2.4e-23	Mal-B2	alpha-1,4-glucosidase activity
gi|313876977|gb|AELG01004683.1|_66072	Bombus terrestris maltase 1-like (LOC100643731) mRNA	3.7e-20	XM_003395866	maltase isoform A	2.4e-23	Mal-B2	alpha-1,4-glucosidase activity
gi|313876977|gb|AELG01004683.1|_66082	Bombus terrestris maltase 1-like (LOC100643731) mRNA	3.7e-20	XM_003395866	maltase isoform A	2.4e-23	Mal-B2	alpha-1,4-glucosidase activity
gi|313876977|gb|AELG01004683.1|_69420	Bombus terrestris maltase 1-like (LOC100643731) mRNA	3.7e-20	XM_003395866	---NA---	NA
gi|313877008|gb|AELG01004652.1|_27079	Bombus terrestris uncharacterized LOC105665828 (LOC105665828) mRNA	3.7e-20	XM_012309330	pol protein	2e-77
gi|313877044|gb|AELG01004617.1|_69648	---NA---	NA		RH65810p	4.2e-117
gi|313877174|gb|AELG01004493.1|_554	Bombus terrestris A disintegrin and metallo ase with thrombospondin motifs 14-like (LOC100642399) mRNA	3.7e-20	XM_012320873	isoform C	9.8e-06	CG4096
gi|313877174|gb|AELG01004493.1|_585	Bombus terrestris A disintegrin and metallo ase with thrombospondin motifs 14-like (LOC100642399) mRNA	3.7e-20	XM_012320873	isoform C	9.9e-06	CG4096
gi|313877174|gb|AELG01004493.1|_586	Bombus terrestris A disintegrin and metallo ase with thrombospondin motifs 14-like (LOC100642399) mRNA	3.7e-20	XM_012320873	isoform C	9.9e-06	CG4096
gi|313877174|gb|AELG01004493.1|_589	Bombus terrestris A disintegrin and metallo ase with thrombospondin motifs 14-like (LOC100642399) mRNA	3.7e-20	XM_012320873	isoform C	9.9e-06	CG4096
gi|313877174|gb|AELG01004493.1|_596	Bombus terrestris A disintegrin and metallo ase with thrombospondin motifs 14-like (LOC100642399) mRNA	3.7e-20	XM_012320873	isoform C	9.9e-06	CG4096
gi|313877174|gb|AELG01004493.1|_608	Bombus terrestris A disintegrin and metallo ase with thrombospondin motifs 14-like (LOC100642399) mRNA	3.7e-20	XM_012320873	isoform C	1e-05	CG4096
gi|313877174|gb|AELG01004493.1|_635	Bombus terrestris A disintegrin and metallo ase with thrombospondin motifs 14-like (LOC100642399) mRNA	3.7e-20	XM_012320873	isoform C	1e-05	CG4096
gi|313877174|gb|AELG01004493.1|_685	Bombus terrestris A disintegrin and metallo ase with thrombospondin motifs 14-like (LOC100642399) mRNA	3.7e-20	XM_012320873	isoform C	1e-05	CG4096
gi|313877174|gb|AELG01004493.1|_725	---NA---	NA		isoform C	1e-05	CG4096
gi|313877345|gb|AELG01004380.1|_25064	Bombus terrestris uncharacterized LOC100647282 (LOC100647282) transcript variant mRNA	3.7e-20	XM_012319462	---NA---	NA
gi|313877374|gb|AELG01004351.1|_258120	Bombus terrestris quinone oxidoreductase (LOC100648892) transcript variant mRNA	3.7e-20	XM_003393265	CG1600-PA	5e-53
gi|313877399|gb|AELG01004329.1|_68002	---NA---	NA		CG10725	3.9e-06	CG10725
gi|313877399|gb|AELG01004329.1|_85149	Bombus terrestris peritrophin-1-like (LOC100642795) mRNA	3.7e-20	XM_003393292	chitin deacetylase-like isoform H	0.00049	Cda5
gi|313877404|gb|AELG01004324.1|_2267	Bombus terrestris polyubiquitin-like (LOC100643517) mRNA	3.7e-20	XM_003393298	ubiquitin	1.4e-86
gi|313877404|gb|AELG01004324.1|_2271	Bombus terrestris polyubiquitin-like (LOC100643517) mRNA	3.7e-20	XM_003393298	ubiquitin	1.4e-86
gi|313877404|gb|AELG01004324.1|_2272	Bombus terrestris polyubiquitin-like (LOC100643517) mRNA	3.7e-20	XM_003393298	ubiquitin	1.4e-86
gi|313877404|gb|AELG01004324.1|_2321	Bombus terrestris polyubiquitin-like (LOC100643517) mRNA	3.7e-20	XM_003393298	ubiquitin	1.4e-86
gi|313877404|gb|AELG01004324.1|_2495	Bombus terrestris ubiquitin-like (LOC105667029) mRNA	3.7e-20	XM_012320078	ubiquitin	1.5e-86
gi|313877476|gb|AELG01004268.1|_396	---NA---	NA		---NA---	NA
gi|313877481|gb|AELG01004263.1|_1636	Bombus terrestris uridine 5 -monophosphate synthase-like (LOC105666889) mRNA	3.7e-20	XM_012319453	UMP synthase r-l gene product	1.9e-48
gi|313877481|gb|AELG01004263.1|_1826	Bombus terrestris uridine 5 -monophosphate synthase-like (LOC105666889) mRNA	3.7e-20	XM_012319453	UMP synthase r-l gene product	1.9e-48
gi|313877481|gb|AELG01004263.1|_2291	Bombus terrestris uridine 5 -monophosphate synthase-like (LOC105666889) mRNA	3.7e-20	XM_012319453	UMP synthase r-l gene product	1.9e-48
gi|313877481|gb|AELG01004263.1|_2313	Bombus terrestris uridine 5 -monophosphate synthase-like (LOC105666889) mRNA	3.7e-20	XM_012319453	UMP synthase r-l gene product	1.9e-48
gi|313877517|gb|AELG01004237.1|_128	---NA---	NA		---NA---	NA
gi|313877517|gb|AELG01004237.1|_142	---NA---	NA		---NA---	NA
gi|313877517|gb|AELG01004237.1|_146	---NA---	NA		---NA---	NA
gi|313877519|gb|AELG01004235.1|_3628	---NA---	NA		cytochrome c oxidase subunit partial (mitochondrion)	1.1e-34
gi|313877519|gb|AELG01004235.1|_3649	---NA---	NA		cytochrome c oxidase subunit partial (mitochondrion)	1.1e-34
gi|313877522|gb|AELG01004232.1|_85	---NA---	NA		gag-pol poly precursor	1e-19
gi|313877523|gb|AELG01004231.1|_68397	Bombus terrestris uncharacterized LOC105667159 (LOC105667159) ncRNA	3.7e-20	XR_001099774	GH20809p	6.1e-05
gi|313877523|gb|AELG01004231.1|_68410	Bombus terrestris uncharacterized LOC105667159 (LOC105667159) ncRNA	4.8e-14	XR_001099774	GH20809p	6e-05
gi|313877530|gb|AELG01004224.1|_366	---NA---	NA		unnamed protein product	3.9e-69
gi|313877537|gb|AELG01004217.1|_26928	Bombus terrestris uncharacterized LOC100647524 (LOC100647524) mRNA	3.7e-20	XM_003402873	CG6475	1.2e-29	CG6475
gi|313877561|gb|AELG01004195.1|_10831	Bombus terrestris heat shock beta-1 (LOC100644627) transcript variant mRNA	3.7e-20	XM_012319358	isoform C	3e-29	CG14207	nucleoplasm cytosol Z disc protein lipidation regulation of autophagy regulation of translational initiation by eIF2 alpha phosphorylation
gi|313877579|gb|AELG01004177.1|_1334	---NA---	NA		---NA---	NA
gi|313877579|gb|AELG01004177.1|_1513	---NA---	NA		---NA---	NA
gi|313877579|gb|AELG01004177.1|_1558	---NA---	NA		---NA---	NA
gi|313877581|gb|AELG01004175.1|_12919	---NA---	NA		POL5_DROME ame: Full=Retrovirus-related Pol poly from transposon opus Includes: ame: Full=Protease Includes: ame: Full=Reverse transcriptase Includes: ame: Full=Endonuclease	5.5e-51
gi|313877585|gb|AELG01004171.1|_766	---NA---	NA		SD02026p	5e-55
gi|313877613|gb|AELG01004149.1|_114040	---NA---	NA		lethal (3) 72Dp	3.1e-55	l(3)72Dp
gi|313878101|gb|AELG01004076.1|_14530	Bombus terrestris actin-5C (LOC100646910) transcript variant mRNA	3.7e-20	XM_003396942	actin-5C	0	DgriGH24372 DereGG18797 D0PTT4 AAEL011197 L798_06755 X777_03096 Q201U9 CpipJ_CPIJ009808 DperGL14888 ACT5C_ANOGA actA3b ACTB2 A4 G5I_04156 KGM_13185 DwilGK20124 DsimGD16764 Q5XUC4 E3UKI0 I4DLZ5 ACT1 I4DIX7 Act5C EAG_04690 DvirGJ14747 S5M4E2 TcasGA2_TC006296 D8WKR5 DmojGI15312 EAI_13843 Act DyakAct57B DsecGM12447 Act57B DpseGA17886	cytoplasm lipid particle microtubule associated complex actin filament Ino80 complex brahma complex structural constituent of cytoskeleton ATP binding mitotic cytokinesis inter-male aggressive behavior chromatin remodeling phagocytosis cytoskeleton organization sperm individualization mushroom body development maintenance of protein location in cell tube formation
gi|313878101|gb|AELG01004076.1|_14551	Bombus terrestris actin-5C (LOC100646910) transcript variant mRNA	3.7e-20	XM_003396942	actin-5C	0	DgriGH24372 DereGG18797 D0PTT4 AAEL011197 L798_06755 X777_03096 Q201U9 CpipJ_CPIJ009808 DperGL14888 ACT5C_ANOGA actA3b ACTB2 A4 G5I_04156 KGM_13185 DwilGK20124 DsimGD16764 Q5XUC4 E3UKI0 I4DLZ5 ACT1 I4DIX7 Act5C EAG_04690 DvirGJ14747 S5M4E2 TcasGA2_TC006296 D8WKR5 DmojGI15312 EAI_13843 Act DyakAct57B DsecGM12447 Act57B DpseGA17886	cytoplasm lipid particle microtubule associated complex actin filament Ino80 complex brahma complex structural constituent of cytoskeleton ATP binding mitotic cytokinesis inter-male aggressive behavior chromatin remodeling phagocytosis cytoskeleton organization sperm individualization mushroom body development maintenance of protein location in cell tube formation
gi|313878147|gb|AELG01004031.1|_2577	---NA---	NA		Cht8	1.4e-105	Cht8
gi|313878234|gb|AELG01003947.1|_382	Bombus terrestris G12-like (LOC100646525) mRNA	8e-17	XM_003402944	---NA---	NA
gi|313878236|gb|AELG01003945.1|_101936	Bombus terrestris Krueppel-like factor 6 (LOC100650325) transcript variant mRNA	3.7e-20	XM_012310504	isoform B	1.4e-31	luna	nucleus transcription factor activity, sequence-specific DNA binding sequence-specific DNA binding metal ion binding mitotic sister chromatid segregation regulation of transcription, DNA-templated preblastoderm mitotic cell cycle
gi|313878284|gb|AELG01003900.1|_124954	Bombus terrestris CCR4-NOT transcription complex subunit 1 (LOC100642693) transcript variant mRNA	3.7e-20	XM_012310292	isoform E	0	Not1	cytoplasm CCR4-NOT complex poly(A)-specific ribonuclease activity protein binding nuclear-transcribed mRNA poly(A) tail shortening mitotic G2 DNA damage checkpoint muscle organ development negative regulation of translation ovarian follicle cell development dendrite morphogenesis
gi|313878351|gb|AELG01003835.1|_1600	---NA---	NA		---NA---	NA
gi|313878390|gb|AELG01003797.1|_53577	---NA---	NA		AChain Crystal Structure Of Drice	4.9e-42
gi|313878390|gb|AELG01003797.1|_53582	---NA---	NA		AChain Crystal Structure Of Drice	4.9e-42
gi|313878402|gb|AELG01003785.1|_24622	---NA---	NA		glutathione transferase-related	6.9e-08
gi|313878426|gb|AELG01003762.1|_37	Bombus terrestris RNA polymerase-associated CTR9 homolog (LOC100643523) partial mRNA	3.7e-20	XM_012308334	isoform B	8.7e-83	CG2469	transcriptionally active chromatin SH2 domain binding ventral cord development positive regulation of transcription from RNA polymerase II promoter
gi|313878426|gb|AELG01003762.1|_57	Bombus terrestris RNA polymerase-associated CTR9 homolog (LOC100643523) partial mRNA	3.7e-20	XM_012308334	isoform B	1.2e-85	CG2469	transcriptionally active chromatin SH2 domain binding ventral cord development positive regulation of transcription from RNA polymerase II promoter
gi|313878427|gb|AELG01003761.1|_31364	Bombus terrestris another transcription unit -like (LOC105665680) mRNA	3.7e-20	XM_012308130	---NA---	NA
gi|313878427|gb|AELG01003761.1|_31410	Bombus terrestris another transcription unit -like (LOC105665680) mRNA	3.7e-20	XM_012308130	---NA---	NA
gi|313878436|gb|AELG01003752.1|_45007	Bombus terrestris venom protease (LOC100652036) transcript variant mRNA	3.7e-20	XM_012308123	isoform B	4.5e-16	CG1299
gi|313878470|gb|AELG01003720.1|_79934	Bombus terrestris ankyrin-3-like (LOC100642686) transcript variant misc_RNA	3.7e-20	XR_001098660	---NA---	NA
gi|313878518|gb|AELG01003673.1|_16142	---NA---	NA		---NA---	NA
gi|313878527|gb|AELG01003664.1|_212671	Bombus terrestris peptidylglycine alpha-hydroxylating monooxygenase (LOC100644842) mRNA	3.7e-20	XM_003394976	Peptidylglycine-alpha-hydroxylating isoform A	8.4e-107
gi|313878638|gb|AELG01003556.1|_255	---NA---	NA		---NA---	NA
gi|313878638|gb|AELG01003556.1|_271	---NA---	NA		---NA---	NA
gi|313878638|gb|AELG01003556.1|_277	---NA---	NA		---NA---	NA
gi|313878649|gb|AELG01003545.1|_15557	Bombus terrestris nucleolar 58-like (LOC100645575) mRNA	3.7e-20	XM_003400883	IP10959p	4.1e-17
gi|313878676|gb|AELG01003518.1|_723	---NA---	NA		CCHamide-2 isoform B	1.8e-14	CCHa2-R	integral component of membrane neuropeptide receptor activity neuropeptide signaling pathway
gi|313878701|gb|AELG01003494.1|_33108	Bombus terrestris filamin-A (LOC100645301) transcript variant mRNA	3.7e-20	XM_012315951	isoform B	0	cher	nucleus cytosol actin filament female germline ring canal outer rim female germline ring canal inner rim apical cortex perinuclear region of cytoplasm contractile ring actin filament binding mitotic nuclear division motor neuron axon guidance protein localization female germline ring canal formation, actin assembly determination of adult lifespan olfactory learning germarium-derived female germ-l…
gi|313878701|gb|AELG01003494.1|_61528	Bombus terrestris filamin-A (LOC100645301) transcript variant mRNA	3.7e-20	XM_003400474	isoform N	9.9e-72	cher	nucleus cytosol actin filament female germline ring canal outer rim female germline ring canal inner rim apical cortex perinuclear region of cytoplasm contractile ring actin filament binding mitotic nuclear division motor neuron axon guidance protein localization female germline ring canal formation, actin assembly determination of adult lifespan olfactory learning germarium-derived female germ-l…
gi|313878750|gb|AELG01003446.1|_160495	Bombus terrestris chymotrypsin-2-like (LOC105665851) mRNA	3.7e-20	XM_012309549	MIP24375p	4.5e-08
gi|313878781|gb|AELG01003416.1|_3571	Bombus terrestris torso (LOC100649534) transcript variant mRNA	3.7e-20	XM_012309481	torso- isoform A	7.6e-56	tsl	extracellular region terminal region determination torso signaling pathway positive regulation of multicellular organism growth
gi|313878837|gb|AELG01003360.1|_18216	Bombus terrestris transmembrane 131 (LOC100647499) transcript variant mRNA	3.7e-20	XM_012309384	isoform A	1.1e-21	CG8370	endomembrane system
gi|313878855|gb|AELG01003342.1|_9337	---NA---	NA		---NA---	NA
gi|313878916|gb|AELG01003282.1|_40	---NA---	NA		---NA---	NA
gi|313878916|gb|AELG01003282.1|_52	---NA---	NA		---NA---	NA
gi|313878916|gb|AELG01003282.1|_796	---NA---	NA		---NA---	NA
gi|313878916|gb|AELG01003282.1|_833	---NA---	NA		---NA---	NA
gi|313878916|gb|AELG01003282.1|_879	---NA---	NA		---NA---	NA
gi|313878916|gb|AELG01003282.1|_906	---NA---	NA		---NA---	NA
gi|313878916|gb|AELG01003282.1|_983	---NA---	NA		---NA---	NA
gi|313878937|gb|AELG01003262.1|_3560	Bombus terrestris integumentary mucin -like (LOC105666821) mRNA	3.7e-20	XM_012319029	---NA---	NA
gi|313878937|gb|AELG01003262.1|_3660	Bombus terrestris integumentary mucin -like (LOC105666821) mRNA	3.7e-20	XM_012319029	---NA---	NA
gi|313878937|gb|AELG01003262.1|_3751	Bombus terrestris integumentary mucin -like (LOC105666821) mRNA	3.7e-20	XM_012319029	---NA---	NA
gi|313878937|gb|AELG01003262.1|_3769	Bombus terrestris integumentary mucin -like (LOC105666821) mRNA	3.7e-20	XM_012319029	---NA---	NA
gi|313878937|gb|AELG01003262.1|_3806	Bombus terrestris integumentary mucin -like (LOC105666821) mRNA	3.7e-20	XM_012319029	---NA---	NA
gi|313878937|gb|AELG01003262.1|_3840	Bombus terrestris integumentary mucin -like (LOC105666821) mRNA	3.7e-20	XM_012319029	---NA---	NA
gi|313878937|gb|AELG01003262.1|_3869	Bombus terrestris integumentary mucin -like (LOC105666821) mRNA	3.7e-20	XM_012319029	---NA---	NA
gi|313879012|gb|AELG01003189.1|_26381	Bombus terrestris transcription initiation factor TFIID subunit 6-like (LOC100643662) transcript variant mRNA	3.7e-20	XM_012314379	TBP-associated factor isoform B	1.2e-154	Taf6	transcription factor TFIID complex transcription factor activity, RNA polymerase II core promoter sequence-specific binding involved in preinitiation complex assembly transcription from RNA polymerase II promoter positive regulation of transcription of Notch receptor target neurogenesis
gi|313879014|gb|AELG01003187.1|_5090	Bombus terrestris hornerin-like (LOC100648951) mRNA	3.7e-20	XM_012314335	---NA---	NA
gi|313879014|gb|AELG01003187.1|_5115	Bombus terrestris hornerin-like (LOC100648951) mRNA	3.7e-20	XM_012314335	---NA---	NA
gi|313879014|gb|AELG01003187.1|_5166	Bombus terrestris hornerin-like (LOC100648951) mRNA	3.7e-20	XM_012314335	---NA---	NA
gi|313879015|gb|AELG01003186.1|_34654	Bombus terrestris glycine-rich cell wall structural 1-like (LOC100651094) transcript variant mRNA	3.7e-20	XM_012314339	---NA---	NA
gi|313879015|gb|AELG01003186.1|_34721	Bombus terrestris glycine-rich cell wall structural 1-like (LOC100651094) transcript variant mRNA	3.7e-20	XM_012314339	---NA---	NA
gi|313879015|gb|AELG01003186.1|_34737	Bombus terrestris glycine-rich cell wall structural 1-like (LOC100651094) transcript variant mRNA	3.7e-20	XM_012314339	---NA---	NA
gi|313879015|gb|AELG01003186.1|_34745	Bombus terrestris glycine-rich cell wall structural 1-like (LOC100651094) transcript variant mRNA	3.7e-20	XM_012314339	---NA---	NA
gi|313879135|gb|AELG01003067.1|_19619	Bombus terrestris very-long-chain (3R)-3-hydroxyacyl- dehydratase (LOC100642777) transcript variant mRNA	3.7e-20	XM_012316640	CG9267	7.9e-84	CG9267	endoplasmic reticulum enzyme binding fatty acid elongation
gi|313879157|gb|AELG01003045.1|_8313	Bombus terrestris transcription factor AP-1 (LOC100645950) mRNA	3.7e-20	XM_003397824	Jun-related isoform A	2.4e-09	Jra	nucleus transcription factor complex cytoplasm RNA polymerase II transcription factor activity, sequence-specific DNA binding transcription factor binding sequence-specific DNA binding protein heterodimerization activity phagocytosis JNK cascade dorsal closure R3/R4 cell fate commitment R7 cell fate commitment negative regulation of antimicrobial humoral response multicellular organism aging woun…
gi|313879163|gb|AELG01003039.1|_7487	Bombus terrestris probable beta-hexosaminidase fdl (LOC100645012) transcript variant mRNA	3.7e-20	XM_012312159	HL07462p	8.2e-76
gi|313879234|gb|AELG01002970.1|_235	---NA---	NA		---NA---	NA
gi|313879286|gb|AELG01002918.1|_9434	Bombus terrestris DNA-directed RNA polymerase III subunit RPC7-like (LOC100646568) mRNA	3.7e-20	XM_003402562	GAGXE_DROME ame: Full=Nucleic-acid-binding from transposon X-element	1.3e-29
gi|313879286|gb|AELG01002918.1|_9459	Bombus terrestris DNA-directed RNA polymerase III subunit RPC7-like (LOC100646568) mRNA	3.7e-20	XM_003402562	GAGXE_DROME ame: Full=Nucleic-acid-binding from transposon X-element	1.3e-29
gi|313879286|gb|AELG01002918.1|_9782	Bombus terrestris DNA-directed RNA polymerase III subunit RPC7-like (LOC100646568) mRNA	3.7e-20	XM_003402562	GAGXE_DROME ame: Full=Nucleic-acid-binding from transposon X-element	1.3e-28
gi|313879333|gb|AELG01002873.1|_2763	---NA---	NA		Y2R2_DROME ame: Full= 115 kDa in type-1 retrotransposable element R1DM ame: Full=ORF 2 ame: Full= 115 kDa in type I retrotransposable element R1DM	4.9e-30
gi|313879333|gb|AELG01002873.1|_2784	---NA---	NA		Y2R2_DROME ame: Full= 115 kDa in type-1 retrotransposable element R1DM ame: Full=ORF 2 ame: Full= 115 kDa in type I retrotransposable element R1DM	4.9e-30
gi|313879430|gb|AELG01002779.1|_30540	Bombus terrestris large neutral amino acids transporter small subunit 2 (LOC100645983) transcript variant mRNA	3.7e-20	XM_012307729	isoform A	3.6e-15	CG4502
gi|313879468|gb|AELG01002742.1|_1310	Bombus terrestris uncharacterized LOC100650678 (LOC100650678) mRNA	3.7e-20	XM_003394776	Ras association family member	2.2e-55	Rassf	protein binding negative regulation of signal transduction response to gamma radiation regulation of multicellular organism growth
gi|313879468|gb|AELG01002742.1|_2028	Bombus terrestris uncharacterized LOC100650678 (LOC100650678) mRNA	3.7e-20	XM_003394776	Ras association family member	2.9e-55	Rassf	protein binding negative regulation of signal transduction response to gamma radiation regulation of multicellular organism growth
gi|313879468|gb|AELG01002742.1|_2552	Bombus terrestris uncharacterized LOC100650678 (LOC100650678) mRNA	3.7e-20	XM_003394776	Ras association family member	3.5e-55	Rassf	protein binding negative regulation of signal transduction response to gamma radiation regulation of multicellular organism growth
gi|313879590|gb|AELG01002624.1|_121254	Bombus terrestris uncharacterized LOC100643810 (LOC100643810) ncRNA	3.7e-20	XR_001098911	---NA---	NA
gi|313879590|gb|AELG01002624.1|_121290	Bombus terrestris uncharacterized LOC100643810 (LOC100643810) ncRNA	3.7e-20	XR_001098911	---NA---	NA
gi|313879642|gb|AELG01002575.1|_1876	Bombus terrestris apoptosis 1 inhibitor-like (LOC100647488) transcript variant mRNA	3.7e-20	XM_012308143	isoform A	9.9e-48	Diap1	intracellular part protease binding cysteine-type endopeptidase inhibitor activity ubiquitin-like protein conjugating enzyme binding ubiquitin-like protein ligase activity protein polyubiquitination germ cell development spermatogenesis sensory organ development organ morphogenesis cell migration negative regulation of cysteine-type endopeptidase activity involved in apoptotic process positive re…
gi|313879642|gb|AELG01002575.1|_1882	Bombus terrestris apoptosis 1 inhibitor-like (LOC100647488) transcript variant mRNA	3.7e-20	XM_012308143	isoform A	9.9e-48	Diap1	intracellular part protease binding cysteine-type endopeptidase inhibitor activity ubiquitin-like protein conjugating enzyme binding ubiquitin-like protein ligase activity protein polyubiquitination germ cell development spermatogenesis sensory organ development organ morphogenesis cell migration negative regulation of cysteine-type endopeptidase activity involved in apoptotic process positive re…
gi|313879642|gb|AELG01002575.1|_1907	Bombus terrestris apoptosis 1 inhibitor-like (LOC100647488) transcript variant mRNA	3.7e-20	XM_012308143	isoform A	1e-47	Diap1	intracellular part protease binding cysteine-type endopeptidase inhibitor activity ubiquitin-like protein conjugating enzyme binding ubiquitin-like protein ligase activity protein polyubiquitination germ cell development spermatogenesis sensory organ development organ morphogenesis cell migration negative regulation of cysteine-type endopeptidase activity involved in apoptotic process positive re…
gi|313879653|gb|AELG01002564.1|_32506	Bombus terrestris facilitated trehalose transporter Tret1-like (LOC100643557) transcript variant mRNA	3.7e-20	XM_012321342	trehalose transporter 1- isoform A	4.1e-105	Tret1-1	integral component of membrane glucose transmembrane transporter activity trehalose transport transmembrane transport
gi|313879653|gb|AELG01002564.1|_33943	Bombus terrestris facilitated trehalose transporter Tret1-like (LOC100643557) transcript variant mRNA	3.7e-20	XM_012321342	trehalose transporter 1-1A	8.7e-105
gi|313879725|gb|AELG01002494.1|_1153	Bombus terrestris serine protease inhibitor 3 4-like (LOC100652301) partial mRNA	3.7e-20	XM_003402528	serpin isoform B	3.7e-26	Spn42Da	negative regulation of proteolysis
gi|313879725|gb|AELG01002494.1|_1295	Bombus terrestris serine protease inhibitor 3 4-like (LOC100652301) partial mRNA	3.7e-20	XM_003402528	serpin isoform B	3.7e-26	Spn42Da	negative regulation of proteolysis
gi|313879725|gb|AELG01002494.1|_1345	Bombus terrestris serine protease inhibitor 3 4-like (LOC100652301) partial mRNA	3.7e-20	XM_003402528	serpin isoform B	3.7e-26	Spn42Da	negative regulation of proteolysis
gi|313879725|gb|AELG01002494.1|_2237	---NA---	NA		serpin isoform B	3.7e-26	Spn42Da	negative regulation of proteolysis
gi|313879725|gb|AELG01002494.1|_2301	---NA---	NA		serpin isoform B	3.7e-26	Spn42Da	negative regulation of proteolysis
gi|313879725|gb|AELG01002494.1|_2319	---NA---	NA		serpin isoform B	3.7e-26	Spn42Da	negative regulation of proteolysis
gi|313879725|gb|AELG01002494.1|_2322	---NA---	NA		serpin isoform B	3.7e-26	Spn42Da	negative regulation of proteolysis
gi|313879725|gb|AELG01002494.1|_2342	---NA---	NA		serpin isoform B	3.7e-26	Spn42Da	negative regulation of proteolysis
gi|313879725|gb|AELG01002494.1|_2360	---NA---	NA		serpin isoform B	3.7e-26	Spn42Da	negative regulation of proteolysis
gi|313879741|gb|AELG01002479.1|_74104	---NA---	NA		ferritin 2 light chain homolog	1.7e-37
gi|313879741|gb|AELG01002479.1|_78151	---NA---	NA		ferritin 1 heavy chain isoform F	8.8e-42	Fer1HCH	extracellular region Golgi apparatus microtubule associated complex intracellular ferritin complex fusome ferrous iron binding ferric iron binding cellular iron ion homeostasis cell proliferation response to fungus post-embryonic development iron ion import into cell detoxification of iron ion
gi|313879745|gb|AELG01002475.1|_3299	Bombus terrestris cytochrome P450 9e2-like (LOC100647368) mRNA	3.7e-20	XM_003393329	CP9F2_DROME ame: Full=Probable cytochrome P450 9f2 ame: Full=CYPIXF2	9.5e-89	Cyp9f2	wing disc development
gi|313879745|gb|AELG01002475.1|_4631	Bombus terrestris cytochrome P450 9e2-like (LOC100647368) mRNA	3.7e-20	XM_003393329	CP9F2_DROME ame: Full=Probable cytochrome P450 9f2 ame: Full=CYPIXF2	9.5e-89	Cyp9f2	wing disc development
gi|313879745|gb|AELG01002475.1|_5200	Bombus terrestris cytochrome P450 9e2-like (LOC100647251) mRNA	3.7e-20	XM_003393328	CP9F2_DROME ame: Full=Probable cytochrome P450 9f2 ame: Full=CYPIXF2	9.5e-89	Cyp9f2	wing disc development
gi|313879774|gb|AELG01002448.1|_41	---NA---	NA		reverse transcriptase	2.5e-171
gi|313879849|gb|AELG01002379.1|_41854	Bombus terrestris cytosol aminopeptidase-like (LOC100643745) mRNA	3.7e-20	XM_003401273	Sperm-Leucylaminopeptidase 2	5.2e-88	S-Lap2
gi|313879849|gb|AELG01002379.1|_41907	Bombus terrestris cytosol aminopeptidase-like (LOC100643745) mRNA	3.7e-20	XM_003401273	Sperm-Leucylaminopeptidase 2	5.2e-88	S-Lap2
gi|313879849|gb|AELG01002379.1|_41909	Bombus terrestris cytosol aminopeptidase-like (LOC100643745) mRNA	3.7e-20	XM_003401273	Sperm-Leucylaminopeptidase 2	5.2e-88	S-Lap2
gi|313879849|gb|AELG01002379.1|_42442	Bombus terrestris cytosol aminopeptidase-like (LOC100643745) mRNA	3.7e-20	XM_003401273	Sperm-Leucylaminopeptidase 2	5.2e-88	S-Lap2
gi|313879849|gb|AELG01002379.1|_42447	Bombus terrestris cytosol aminopeptidase-like (LOC100643745) mRNA	3.7e-20	XM_003401273	Sperm-Leucylaminopeptidase 2	5.2e-88	S-Lap2
gi|313879849|gb|AELG01002379.1|_42463	Bombus terrestris cytosol aminopeptidase-like (LOC100643745) mRNA	3.7e-20	XM_003401273	Sperm-Leucylaminopeptidase 2	5.2e-88	S-Lap2
gi|313879849|gb|AELG01002379.1|_42479	Bombus terrestris cytosol aminopeptidase-like (LOC100643745) mRNA	3.7e-20	XM_003401273	Sperm-Leucylaminopeptidase 2	5.2e-88	S-Lap2
gi|313879849|gb|AELG01002379.1|_42510	Bombus terrestris cytosol aminopeptidase-like (LOC100643745) mRNA	3.7e-20	XM_003401273	Sperm-Leucylaminopeptidase 2	5.2e-88	S-Lap2
gi|313879849|gb|AELG01002379.1|_42522	Bombus terrestris cytosol aminopeptidase-like (LOC100643745) mRNA	3.7e-20	XM_003401273	Sperm-Leucylaminopeptidase 2	5.2e-88	S-Lap2
gi|313879870|gb|AELG01002359.1|_31145	Bombus terrestris dihydropteridine reductase (LOC100642707) transcript variant misc_RNA	3.7e-20	XR_001099375	dihydropteridine isoform A	3.9e-49	Dhpr	6,7-dihydropteridine reductase activity metabolic process
gi|313879935|gb|AELG01002296.1|_148762	Bombus terrestris mucin-19-like (LOC100649746) mRNA	3.7e-20	XM_012316529	---NA---	NA
gi|313879978|gb|AELG01002255.1|_90221	Bombus terrestris uncharacterized LOC100646926 (LOC100646926) transcript variant mRNA	3.7e-20	XM_012316244	---NA---	NA
gi|313879981|gb|AELG01002252.1|_85587	Bombus terrestris uridine 5 -monophosphate synthase-like (LOC100651419) mRNA	3.7e-20	XM_012316239	UMP synthase r-l gene product	1e-108
gi|313879981|gb|AELG01002252.1|_85948	Bombus terrestris uridine 5 -monophosphate synthase-like (LOC100651419) mRNA	3.7e-20	XM_012316239	UMP synthase r-l gene product	1e-108
gi|313879981|gb|AELG01002252.1|_86008	Bombus terrestris uridine 5 -monophosphate synthase-like (LOC100651419) mRNA	3.7e-20	XM_012316239	UMP synthase r-l gene product	1e-108
gi|313879981|gb|AELG01002252.1|_86013	Bombus terrestris uridine 5 -monophosphate synthase-like (LOC100651419) mRNA	3.7e-20	XM_012316239	UMP synthase r-l gene product	1e-108
gi|313879981|gb|AELG01002252.1|_86222	Bombus terrestris uridine 5 -monophosphate synthase-like (LOC100651419) mRNA	8e-17	XM_012316239	UMP synthase r-l gene product	1e-108
gi|313879981|gb|AELG01002252.1|_86352	Bombus terrestris uridine 5 -monophosphate synthase-like (LOC100651419) mRNA	3.7e-20	XM_012316239	UMP synthase r-l gene product	1e-108
gi|313880022|gb|AELG01002213.1|_140478	---NA---	NA		isoform B	1.3e-64	CG6910
gi|313880142|gb|AELG01002097.1|_3004	---NA---	NA		transposase	8.8e-23
gi|313880307|gb|AELG01001938.1|_81876	Bombus terrestris keratin-associated 19-2-like (LOC105666039) mRNA	3.7e-20	XM_012311662	---NA---	NA
gi|313880307|gb|AELG01001938.1|_81902	Bombus terrestris keratin-associated 19-2-like (LOC105666039) mRNA	3.7e-20	XM_012311662	---NA---	NA
gi|313880322|gb|AELG01001924.1|_7576	Bombus terrestris uncharacterized LOC100650668 (LOC100650668) transcript variant mRNA	3.7e-20	XM_012317875	---NA---	NA
gi|313880345|gb|AELG01001903.1|_4793	---NA---	NA		isoform E	6.3e-144	UGP	cytosol UTP:glucose-1-phosphate uridylyltransferase activity UDP-glucose metabolic process
gi|313880354|gb|AELG01001894.1|_71277	Bombus terrestris E3 ubiquitin- ligase AMFR-like (LOC100647877) transcript variant mRNA	3.7e-20	XM_003401710	lethal (2) k12914	2e-18	l(2)k12914 DereGG23447 DsimGD22410 DyakGE11027 DsecGM12988	plasma membrane oligosaccharyltransferase complex integral component of membrane dolichyl-diphosphooligosaccharide-protein glycotransferase activity protein glycosylation negative regulation of apoptotic process
gi|313880357|gb|AELG01001891.1|_65299	---NA---	NA		---NA---	NA
gi|313880357|gb|AELG01001891.1|_65332	---NA---	NA		---NA---	NA
gi|313880374|gb|AELG01001875.1|_33881	Bombus terrestris uncharacterized LOC100649397 (LOC100649397) transcript variant mRNA	3.7e-20	XM_012317657	---NA---	NA
gi|313880495|gb|AELG01001760.1|_27036	Bombus terrestris cytochrome P450 6k1-like (LOC100642936) mRNA	3.7e-20	XM_012314843	C6A13_DROME ame: Full=Probable cytochrome P450 6a13 ame: Full=CYPVIA13	7e-23	Cyp6a13	defense response to bacterium
gi|313880495|gb|AELG01001760.1|_27812	Bombus terrestris cytochrome P450 6k1-like (LOC100642936) mRNA	3.7e-20	XM_012314843	C6A23_DROME ame: Full=Probable cytochrome P450 6a23 ame: Full=CYPVIA23	1.3e-27	Cyp6a23
gi|313880506|gb|AELG01001749.1|_27348	Bombus terrestris neprilysin-like (LOC100650573) transcript variant mRNA	3.7e-20	XM_012314808	neprilysin isoform A	3.1e-14	Nep1	integral component of membrane metalloendopeptidase activity proteolysis
gi|313880506|gb|AELG01001749.1|_5182	PREDICTED: Bombus terrestris uncharacterized protein C05D11.1-like (LOC100649893), mRNA	3.7e-20	XM_003399624	isoform A	5.7e-11	CG3107
gi|313880511|gb|AELG01001745.1|_6829	Bombus terrestris collagen alpha-1(IV) chain (LOC100649188) mRNA	3.7e-20	XM_003399617	alpha-1 type IV collagen	2.2e-18
gi|313880548|gb|AELG01001708.1|_19794	---NA---	NA		---NA---	NA
gi|313880587|gb|AELG01001670.1|_103965	Bombus terrestris alpha-glucosidase-like (LOC100650530) mRNA	3.7e-20	XM_012311227	FI06514p	1.7e-173
gi|313880652|gb|AELG01001605.1|_6601	Bombus terrestris uncharacterized LOC105666222 (LOC105666222) ncRNA	3.7e-20	XR_001099116	---NA---	NA
gi|313880673|gb|AELG01001584.1|_11366	---NA---	NA		cytochrome oxidase subunit partial (mitochondrion)	2.2e-57
gi|313880677|gb|AELG01001580.1|_738	---NA---	NA		---NA---	NA
gi|313880710|gb|AELG01001547.1|_38194	Bombus terrestris chymotrypsin-1-like (LOC100648122) mRNA	1.7e-13	XM_003393487	isoform A	3.5e-12	CG17571	serine-type endopeptidase activity proteolysis
gi|313880710|gb|AELG01001547.1|_38284	Bombus terrestris chymotrypsin-1-like (LOC100648122) mRNA	3.7e-20	XM_003393487	isoform A	3.4e-12	CG17571	serine-type endopeptidase activity proteolysis
gi|313880720|gb|AELG01001537.1|_16552	Bombus terrestris laminin subunit beta-1 (LOC100642555) transcript variant mRNA	3.7e-20	XM_012314799	isoform A	2e-132	LanB1	basal lamina endomembrane system embryonic heart tube morphogenesis gonad development cell migration cell adhesion mediated by integrin substrate adhesion-dependent cell spreading positive regulation of innate immune response defense response to Gram-negative bacterium cardiac muscle cell development basement membrane assembly
gi|313880733|gb|AELG01001524.1|_48128	Bombus terrestris zinc finger matrin-type 5 (LOC100644088) transcript variant mRNA	3.7e-20	XM_012314407	IP04495p	1.2e-05
gi|313880925|gb|AELG01001333.1|_175	---NA---	NA		RE08130p, partial	4e-24
gi|313880925|gb|AELG01001333.1|_196	---NA---	NA		RE08130p, partial	1.4e-24
gi|313880946|gb|AELG01001312.1|_1440	Bombus terrestris chromatin-remodeling complex ATPase chain Iswi-like (LOC100643266) mRNA	3.7e-20	XM_012318820	imitation isoform A	0	Iswi	nuclear chromatin transcription factor complex polytene chromosome CHRAC NURF complex ACF complex RSF complex brahma complex DNA binding DNA helicase activity ATP binding DNA-dependent ATPase activity transcription factor binding nucleosome binding nucleosome-dependent ATPase activity nucleosome assembly transcription, DNA-templated muscle organ development nucleosome positioning sensory percepti…
gi|313880946|gb|AELG01001312.1|_2786	Bombus terrestris chromatin-remodeling complex ATPase chain Iswi-like (LOC100643266) mRNA	3.7e-20	XM_012318820	imitation isoform A	0	Iswi	nuclear chromatin transcription factor complex polytene chromosome CHRAC NURF complex ACF complex RSF complex brahma complex DNA binding DNA helicase activity ATP binding DNA-dependent ATPase activity transcription factor binding nucleosome binding nucleosome-dependent ATPase activity nucleosome assembly transcription, DNA-templated muscle organ development nucleosome positioning sensory percepti…
gi|313880946|gb|AELG01001312.1|_375	Bombus terrestris chromatin-remodeling complex ATPase chain Iswi-like (LOC100643266) mRNA	3.7e-20	XM_012318820	imitation isoform A	0	Iswi	nuclear chromatin transcription factor complex polytene chromosome CHRAC NURF complex ACF complex RSF complex brahma complex DNA binding DNA helicase activity ATP binding DNA-dependent ATPase activity transcription factor binding nucleosome binding nucleosome-dependent ATPase activity nucleosome assembly transcription, DNA-templated muscle organ development nucleosome positioning sensory percepti…
gi|313880946|gb|AELG01001312.1|_453	Bombus terrestris chromatin-remodeling complex ATPase chain Iswi-like (LOC100643266) mRNA	3.7e-20	XM_012318820	imitation isoform A	0	Iswi	nuclear chromatin transcription factor complex polytene chromosome CHRAC NURF complex ACF complex RSF complex brahma complex DNA binding DNA helicase activity ATP binding DNA-dependent ATPase activity transcription factor binding nucleosome binding nucleosome-dependent ATPase activity nucleosome assembly transcription, DNA-templated muscle organ development nucleosome positioning sensory percepti…
gi|313880952|gb|AELG01001307.1|_81373	Bombus terrestris uncharacterized LOC105665953 (LOC105665953) mRNA	3.7e-20	XM_012310697	---NA---	NA
gi|313880952|gb|AELG01001307.1|_81374	Bombus terrestris uncharacterized LOC105665953 (LOC105665953) mRNA	3.7e-20	XM_012310697	---NA---	NA
gi|313880971|gb|AELG01001289.1|_33628	Bombus terrestris uncharacterized LOC100643149 (LOC100643149) mRNA	3.7e-20	XM_003393218	---NA---	NA
gi|313880971|gb|AELG01001289.1|_34609	Bombus terrestris uncharacterized LOC100643149 (LOC100643149) mRNA	3.7e-20	XM_003393218	---NA---	NA
gi|313880971|gb|AELG01001289.1|_42793	Bombus terrestris uncharacterized LOC100643108 (LOC100643108) mRNA	3.7e-20	XM_003393138	---NA---	NA
gi|313880973|gb|AELG01001287.1|_7361	Bombus terrestris BMP-binding endothelial regulator -like (LOC100652150) mRNA	3.7e-20	XM_003393208	---NA---	NA
gi|313881187|gb|AELG01001076.1|_6678	Bombus terrestris uncharacterized LOC100644365 (LOC100644365) mRNA	3.7e-20	XM_012309129	charged multivesicular body isoform A	1.3e-35	DereGG15729 Chmp1 DsecGM14926 DsimGD12332	ESCRT III complex late endosome apical part of cell endosome transport via multivesicular body sorting pathway negative regulation of epidermal growth factor receptor signaling pathway
gi|313881187|gb|AELG01001076.1|_7455	Bombus terrestris uncharacterized LOC100644365 (LOC100644365) mRNA	3.7e-20	XM_012309129	charged multivesicular body isoform A	1.3e-35	DereGG15729 Chmp1 DsecGM14926 DsimGD12332	ESCRT III complex late endosome apical part of cell endosome transport via multivesicular body sorting pathway negative regulation of epidermal growth factor receptor signaling pathway
gi|313881235|gb|AELG01001031.1|_374177	---NA---	NA		---NA---	NA
gi|313881246|gb|AELG01001020.1|_57215	Bombus terrestris voltage-dependent calcium channel subunit alpha-2 delta-3 (LOC100651196) mRNA	3.7e-20	XM_012308865	CG5705- partial	1.7e-77	CG5705	mitochondrion translation release factor activity, codon specific translational termination
gi|313881269|gb|AELG01000998.1|_10150	---NA---	NA		COG4_DROME ame: Full=Conserved oligomeric Golgi complex subunit 4 Short=COG complex subunit 4 ame: Full=Component of oligomeric Golgi complex 4	3.6e-111	CG7456
gi|313881275|gb|AELG01000992.1|_15918	Bombus terrestris N-acetyltransferase 6 (LOC100646501) mRNA	1.7e-18	XM_003395559	isoform A	1.7e-30	CG9471	NADPH dehydrogenase activity biliverdin reductase activity multicellular organism reproduction
gi|313881280|gb|AELG01000987.1|_1111	---NA---	NA		---NA---	NA
gi|313881323|gb|AELG01000970.1|_13750	Bombus terrestris uncharacterized MFS-type transporter -like (LOC100642804) transcript variant mRNA	3.7e-20	XM_003395446	isoform A	6.1e-24	CG1358
gi|313881447|gb|AELG01000853.1|_52524	Bombus terrestris uncharacterized LOC100649576 (LOC100649576) transcript variant mRNA	3.7e-20	XM_012309857	Nahoda protein	2.5e-62
gi|313881514|gb|AELG01000786.1|_55539	Bombus terrestris DNA-directed RNA polymerase II subunit RPB1-like (LOC100649338) mRNA	3.7e-20	XM_003398008	---NA---	NA
gi|313881535|gb|AELG01000765.1|_1194	---NA---	NA		Z band alternatively spliced PDZ-motif isoform H	1e-13	Zasp66	Z disc protein phosphatase 1 binding muscle alpha-actinin binding mesoderm development myofibril assembly
gi|313881547|gb|AELG01000753.1|_14606	---NA---	NA		RIO kinase isoform A	4.5e-130	RIOK1	nucleus cytoplasm protein kinase activity protein phosphorylation cellular response to starvation positive regulation of multicellular organism growth positive regulation of glial cell proliferation positive regulation of peptide hormone secretion
gi|313881547|gb|AELG01000753.1|_14658	---NA---	NA		RIO kinase isoform A	4.5e-130	RIOK1	nucleus cytoplasm protein kinase activity protein phosphorylation cellular response to starvation positive regulation of multicellular organism growth positive regulation of glial cell proliferation positive regulation of peptide hormone secretion
gi|313881625|gb|AELG01000675.1|_18319	Bombus terrestris poly(U)-specific endoribonuclease homolog (LOC100644333) mRNA	3.7e-20	XM_012313044	GH21533p	1.4e-39
gi|313881671|gb|AELG01000629.1|_12900	Bombus terrestris hypoxia up-regulated 1 (LOC100642850) mRNA	3.7e-20	XM_003398119	isoform A	6.1e-31	CG2918	extracellular space lipid particle endomembrane system multicellular organism reproduction
gi|313881671|gb|AELG01000629.1|_12909	Bombus terrestris hypoxia up-regulated 1 (LOC100642850) mRNA	3.7e-20	XM_003398119	isoform A	6.1e-31	CG2918	extracellular space lipid particle endomembrane system multicellular organism reproduction
gi|313881671|gb|AELG01000629.1|_12985	Bombus terrestris hypoxia up-regulated 1 (LOC100642850) mRNA	3.7e-20	XM_003398119	isoform A	6.1e-31	CG2918	extracellular space lipid particle endomembrane system multicellular organism reproduction
gi|313881671|gb|AELG01000629.1|_13224	Bombus terrestris hypoxia up-regulated 1 (LOC100642850) mRNA	3.7e-20	XM_003398119	isoform A	6.1e-31	CG2918	extracellular space lipid particle endomembrane system multicellular organism reproduction
gi|313881671|gb|AELG01000629.1|_13264	Bombus terrestris hypoxia up-regulated 1 (LOC100642850) mRNA	3.7e-20	XM_003398119	isoform A	6.1e-31	CG2918	extracellular space lipid particle endomembrane system multicellular organism reproduction
gi|313881797|gb|AELG01000503.1|_37954	Bombus terrestris uncharacterized LOC100644923 (LOC100644923) transcript variant mRNA	3.7e-20	XM_012307760	---NA---	NA
gi|313881797|gb|AELG01000503.1|_43129	Bombus terrestris uncharacterized LOC100644923 (LOC100644923) transcript variant mRNA	3.7e-20	XM_012307761	SD02860p	2.8e-17
gi|313881799|gb|AELG01000501.1|_1129	---NA---	NA		CG9799- partial	2.1e-112	CG9799	cellular response to starvation
gi|313881799|gb|AELG01000501.1|_1138	---NA---	NA		CG9799- partial	2.1e-112	CG9799	cellular response to starvation
gi|313881799|gb|AELG01000501.1|_1158	---NA---	NA		CG9799- partial	2.1e-112	CG9799	cellular response to starvation
gi|313881799|gb|AELG01000501.1|_1365	---NA---	NA		CG9799- partial	6.3e-113	CG9799	cellular response to starvation
gi|313881799|gb|AELG01000501.1|_1405	---NA---	NA		CG9799- partial	6.3e-113	CG9799	cellular response to starvation
gi|313881799|gb|AELG01000501.1|_1870	---NA---	NA		CG9799- partial	6.3e-113	CG9799	cellular response to starvation
gi|313881799|gb|AELG01000501.1|_625	---NA---	NA		CG9799- partial	6.3e-113	CG9799	cellular response to starvation
gi|313881799|gb|AELG01000501.1|_804	---NA---	NA		CG9799- partial	6.3e-113	CG9799	cellular response to starvation
gi|313881938|gb|AELG01000362.1|_25745	---NA---	NA		CG10206-PA	0
gi|313881938|gb|AELG01000362.1|_27573	---NA---	NA		CG10206-PA	0
gi|313881938|gb|AELG01000362.1|_27590	---NA---	NA		CG10206-PA	0
gi|313881938|gb|AELG01000362.1|_27606	---NA---	NA		CG10206-PA	0
gi|313881986|gb|AELG01000314.1|_36544	Bombus terrestris uncharacterized LOC100647826 (LOC100647826) transcript variant ncRNA	3.7e-20	XR_001099538	---NA---	NA
gi|313882001|gb|AELG01000299.1|_10801	---NA---	NA		isoform A	3.8e-12	mrj	unfolded protein binding protein folding
gi|313882015|gb|AELG01000285.1|_31829	Bombus terrestris homeobox Hox-A3-like (LOC100650346) transcript variant mRNA	3.7e-20	XM_012318240	---NA---	NA
gi|313882060|gb|AELG01000240.1|_39989	Bombus terrestris polyubiquitin-B (LOC100648000) mRNA	3.7e-20	XM_003402262	ubiquitin	5.1e-140
gi|313882060|gb|AELG01000240.1|_40055	Bombus terrestris polyubiquitin-B (LOC100648000) mRNA	3.7e-20	XM_003402262	ubiquitin	5.1e-140
gi|313882060|gb|AELG01000240.1|_40100	Bombus terrestris polyubiquitin-B (LOC100648000) mRNA	3.7e-20	XM_003402262	ubiquitin	5.1e-140
gi|313882060|gb|AELG01000240.1|_40148	Bombus terrestris polyubiquitin-B (LOC100648000) mRNA	3.7e-20	XM_003402262	ubiquitin	5.1e-140
gi|313882060|gb|AELG01000240.1|_40331	Bombus terrestris polyubiquitin-B (LOC100648000) mRNA	3.7e-20	XM_003402262	ubiquitin	5.1e-140
gi|313882080|gb|AELG01000220.1|_5278	Bombus terrestris aminopeptidase N-like (LOC105666734) mRNA	3.7e-20	XM_012318455	isoform A	2.1e-18	CG11951	peptidase activity, acting on L-amino acid peptides
gi|313882110|gb|AELG01000190.1|_6125	Bombus terrestris uncharacterized LOC105666179 (LOC105666179) transcript variant misc_RNA	3.7e-20	XR_001099071	wishful isoform B	1e-06	wit
gi|313882118|gb|AELG01000182.1|_3223	---NA---	NA		---NA---	NA
gi|313882123|gb|AELG01000177.1|_25203	---NA---	NA		amon- partial	5.8e-19	amon	extracellular region peptidase activity instar larval or pupal development peptide hormone processing carbohydrate homeostasis larval wandering behavior hatching behavior
gi|313882123|gb|AELG01000177.1|_25218	---NA---	NA		AF033117_1prohormone and neuropeptide processing protease	9e-19
gi|313882123|gb|AELG01000177.1|_25236	---NA---	NA		AF033117_1prohormone and neuropeptide processing protease	1.1e-18
gi|313882149|gb|AELG01000151.1|_112181	---NA---	NA		isoform C	3.8e-94	CG10237	intracellular transporter activity vitamin E binding retinal binding transport
gi|313882152|gb|AELG01000148.1|_19326	---NA---	NA		GM13209p	5.1e-18
gi|313882207|gb|AELG01000093.1|_180	---NA---	NA		---NA---	NA
gi|313882207|gb|AELG01000093.1|_379	---NA---	NA		---NA---	NA
gi|313882208|gb|AELG01000092.1|_17302	---NA---	NA		CYP-1	1.8e-63
gi|313882243|gb|AELG01000057.1|_8974	---NA---	NA		isoform A	2.9e-45	CG9914
